# Supplementary material for: Coumarin–azasugar–benzyl conjugates as non-neurotoxic dual inhibitors of butyrylcholinesterase and cancer cell growth
Source: Royal Society of Chemistry journal article supplement (doi:10.1039/d4ob00312h), 2024-01-01
Supplement: d4ob00312h1.pdf [file d4ob00312h1.pdf]

## Coumarin-azasugar-benzyl conjugates as non-neurotoxic dual inhibitors of butyrylcholinesterase and cancer cell growth

I. Caroline Vaaland Holmgard,<sup>a</sup> Aday González-Bakker,<sup>b</sup> Eleonora Poeta,<sup>c</sup> Adrián Puerta,<sup>b</sup> Miguel X. Fernandes,<sup>d</sup> Barbara Monti,<sup>c</sup> José G. Fernández-Bolaños,<sup>e</sup> José M. Padrón,<sup>\*b</sup> Óscar López,<sup>\*e</sup> and Emil Lindbäck<sup>\*a</sup>

<sup>a</sup>Department of Chemistry, Bioscience and Environmental Engineering, Faculty of Science and Technology, University of Stavanger, Stavanger, Norway

<sup>b</sup>BioLab, Instituto Universitario de Bio-Orgánica "Antonio González" (IUBO-AG), Universidad de La Laguna, c/Astrofísico Francisco Sánchez 2, La Laguna, E-38206, Spain

<sup>c</sup>Department of Pharmacy and Biotechnology, University of Bologna, Bologna, Italy

<sup>d</sup>Department of Engineering and Chemical Sciences, Karlstad University, Karlstad, Sweden

<sup>e</sup>Departamento de Química Orgánica, Facultad de Química, Universidad de Sevilla, Seville, Spain.

### Table of content

|                                             |      |
|---------------------------------------------|------|
| <sup>1</sup> H and <sup>13</sup> C NMR      | 2-31 |
| Table S1 Antiproliferative activity studies | 32   |

<sup>1</sup>H-NMR spectra of compound **10** (CDCl<sub>3</sub>, 400.13 MHz)

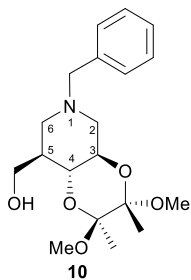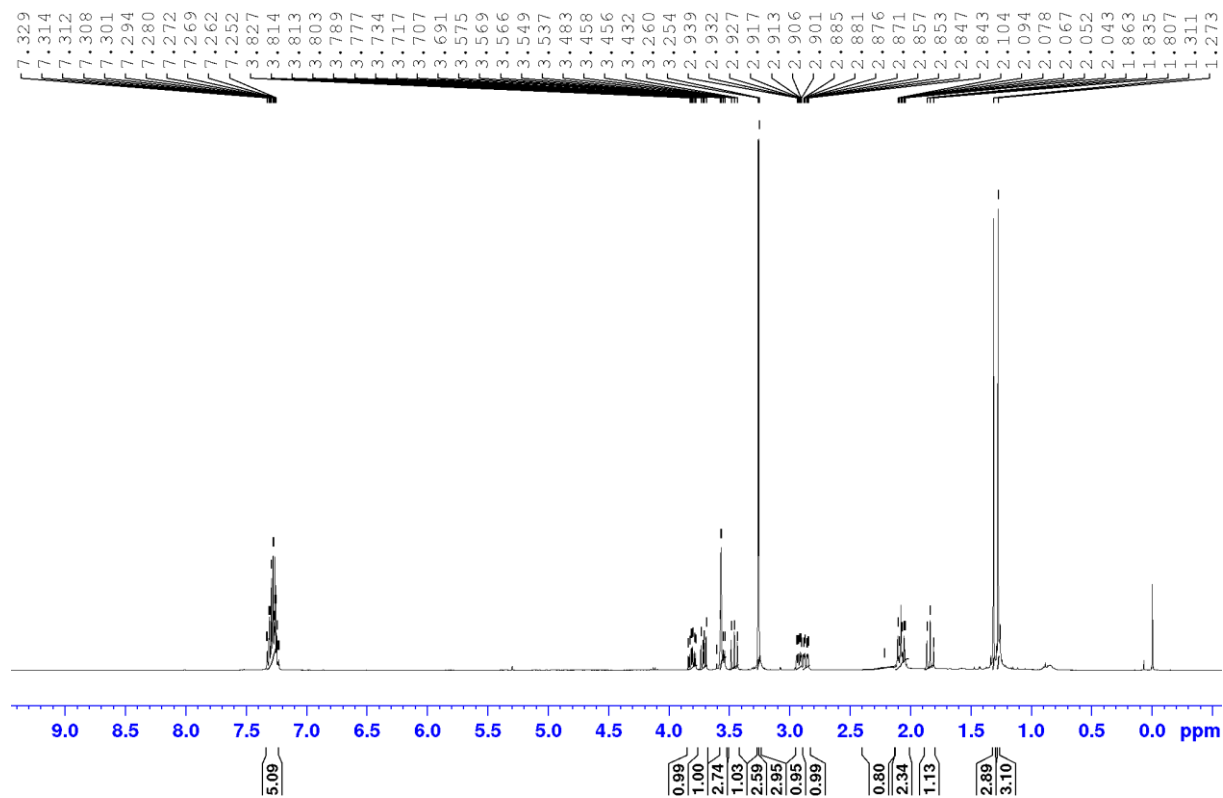

<sup>13</sup>C-NMR spectra of compound **10** (CDCl<sub>3</sub>, 100.61 MHz)

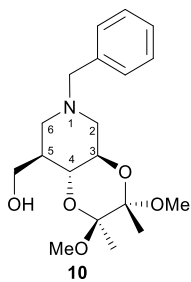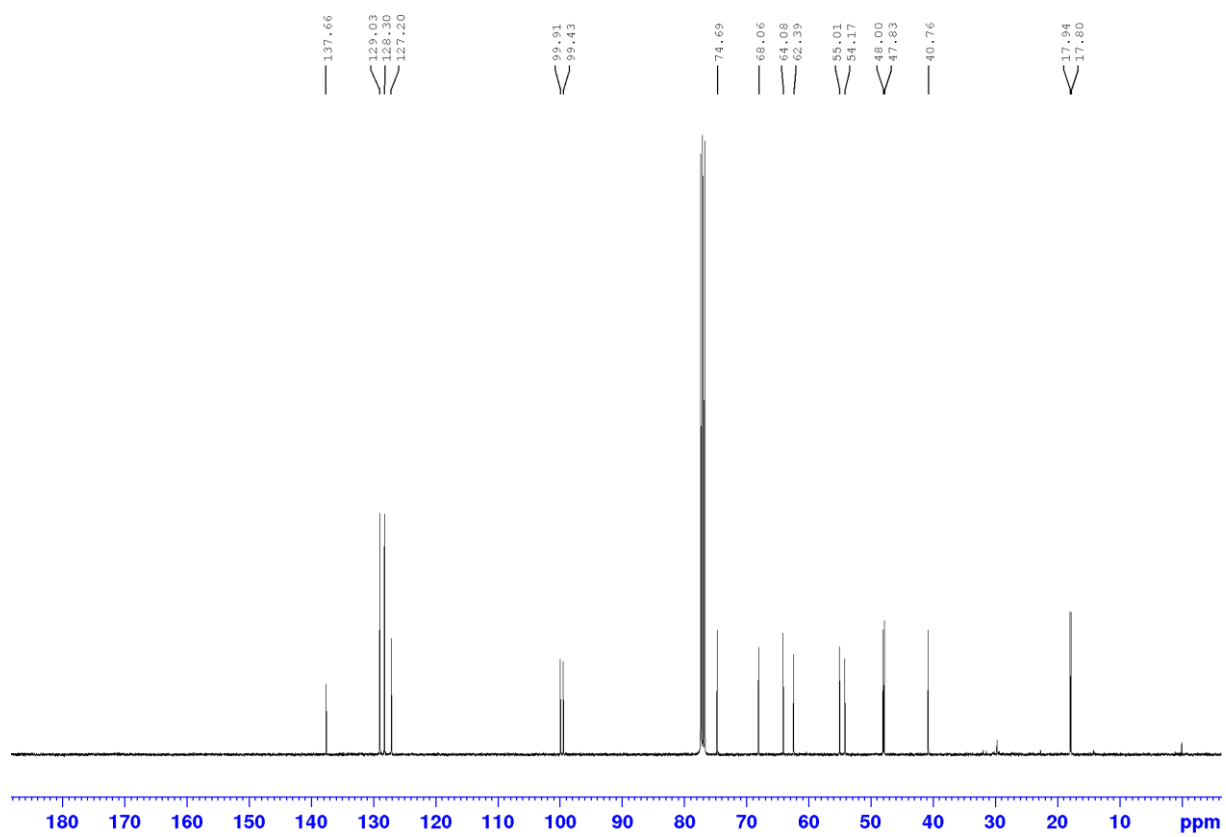

<sup>1</sup>H-NMR spectra of compound **11** (CD<sub>3</sub>OD, 400.13 MHz)

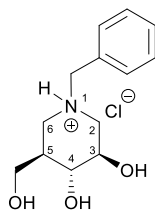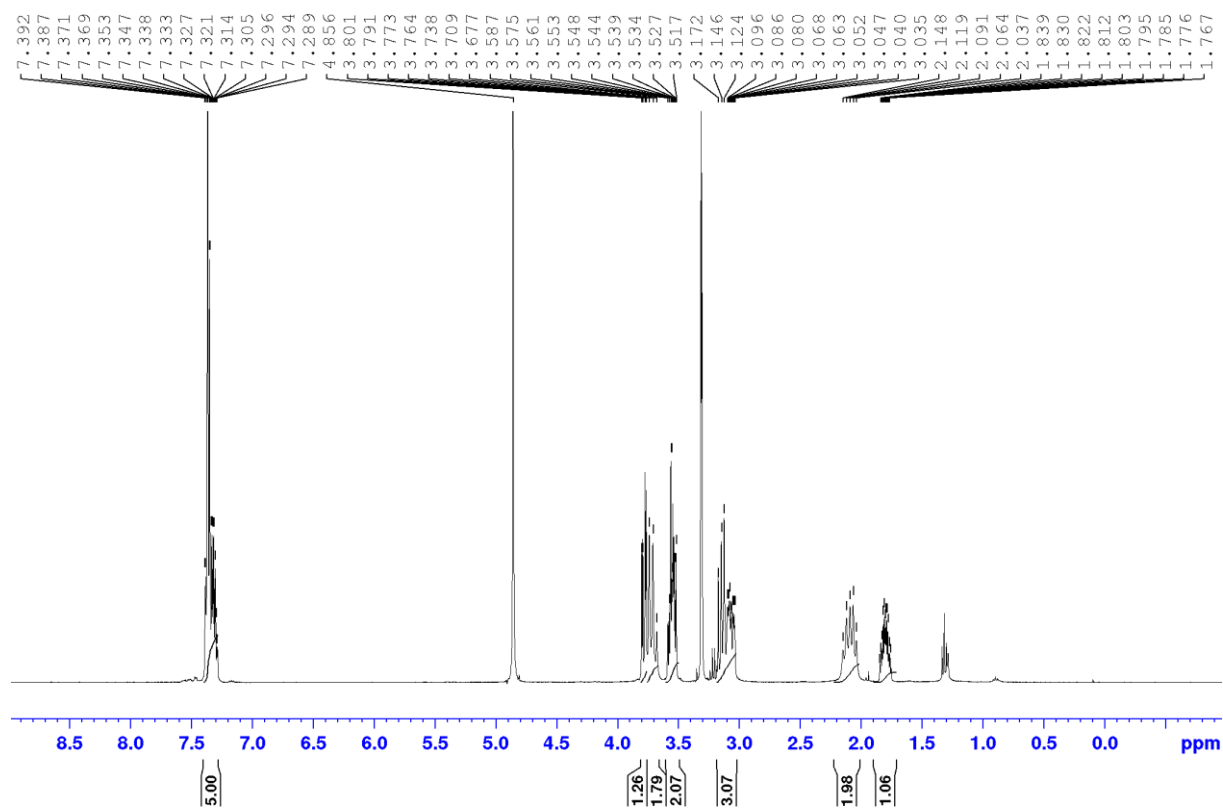

<sup>13</sup>C-NMR spectra of compound **11** (CD<sub>3</sub>OD, 100.61 MHz)

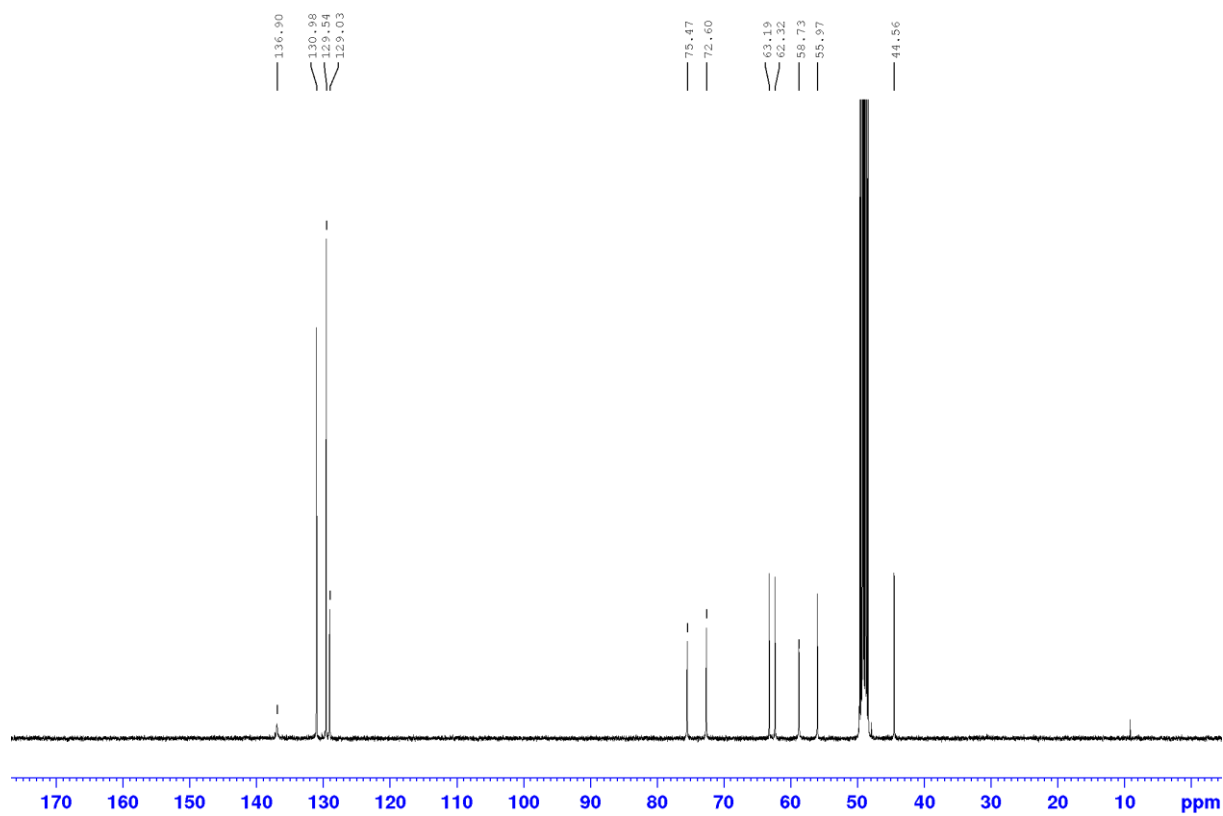

<sup>1</sup>H-NMR spectra of compound **12** (CDCl<sub>3</sub>, 400.13 MHz)

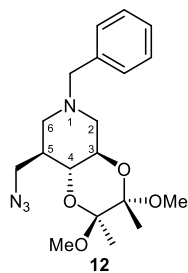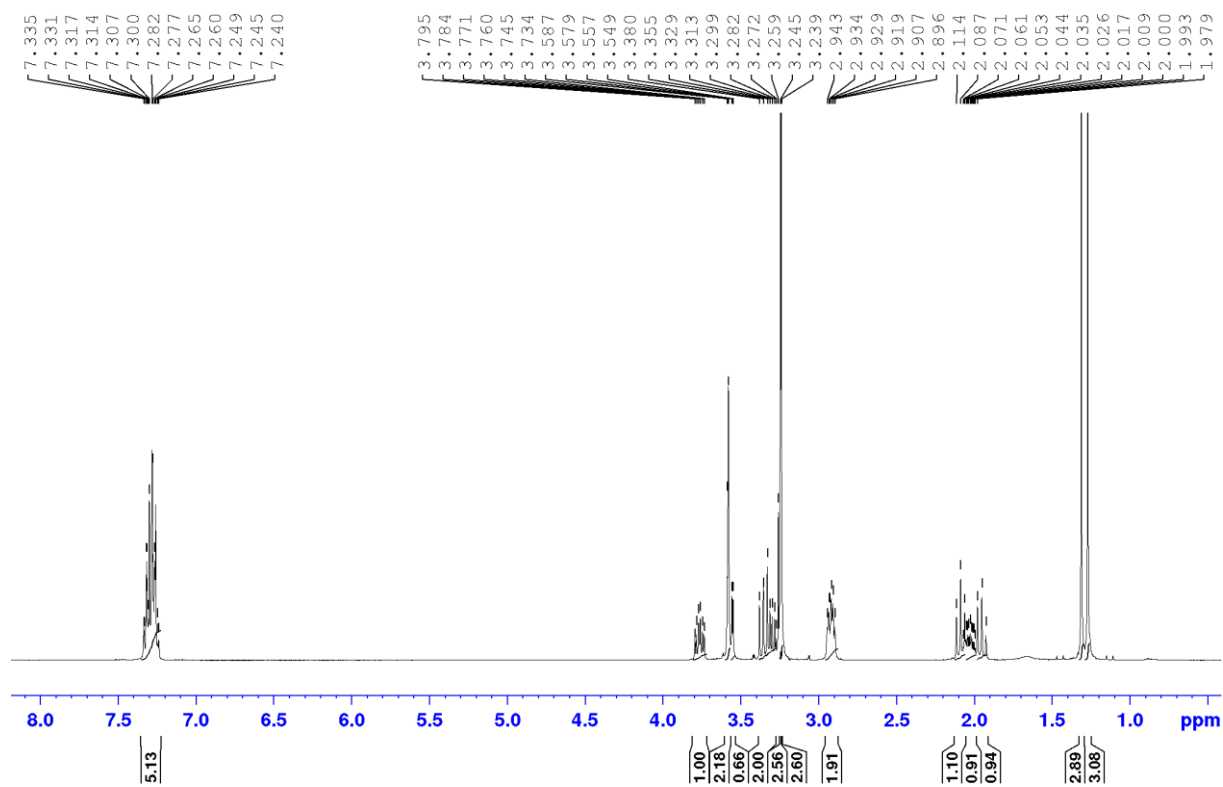

<sup>13</sup>C-NMR spectra of compound **12** (CDCl<sub>3</sub>, 100.61 MHz)

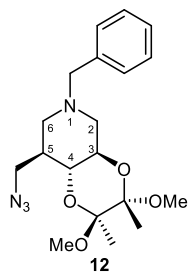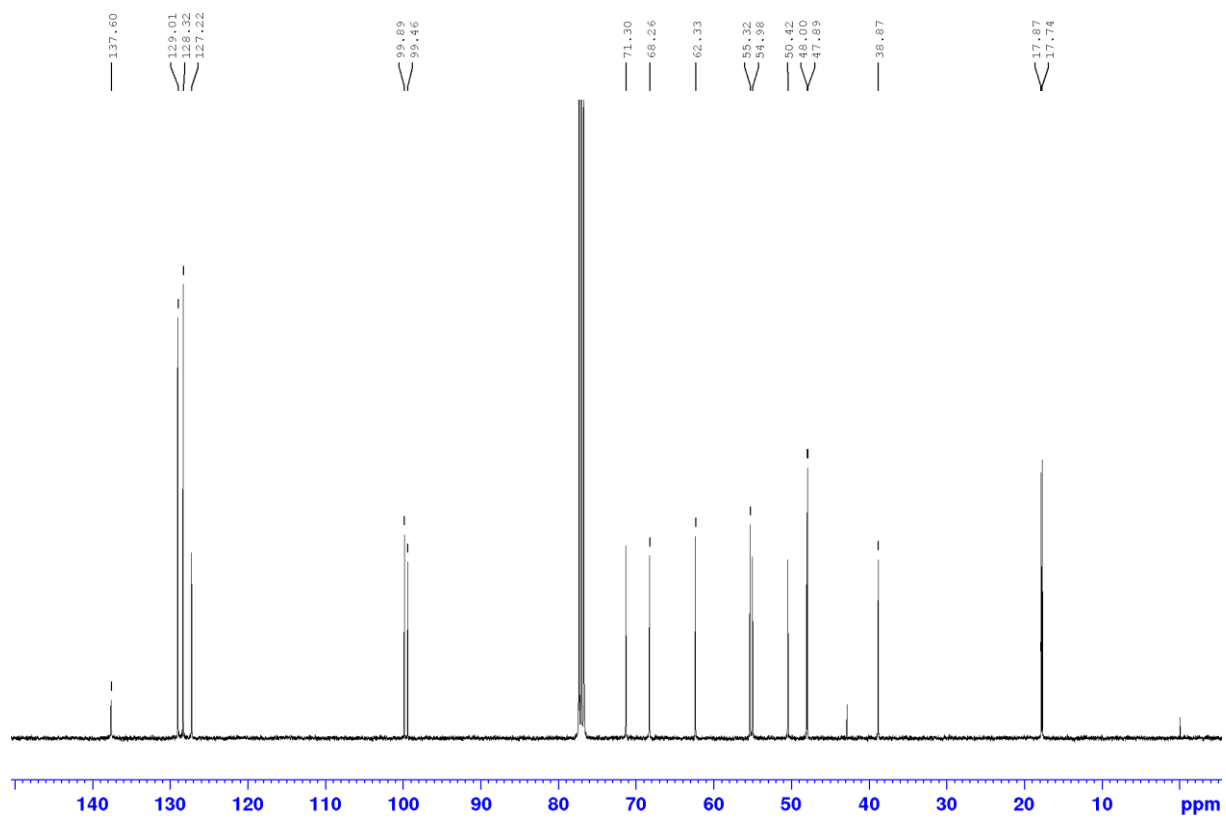

<sup>1</sup>H-NMR spectra of compound **17a** (CDCl<sub>3</sub>, 400.13 MHz)

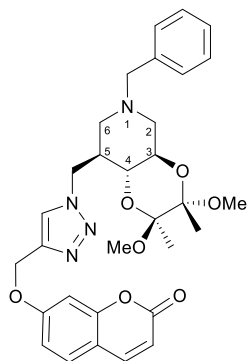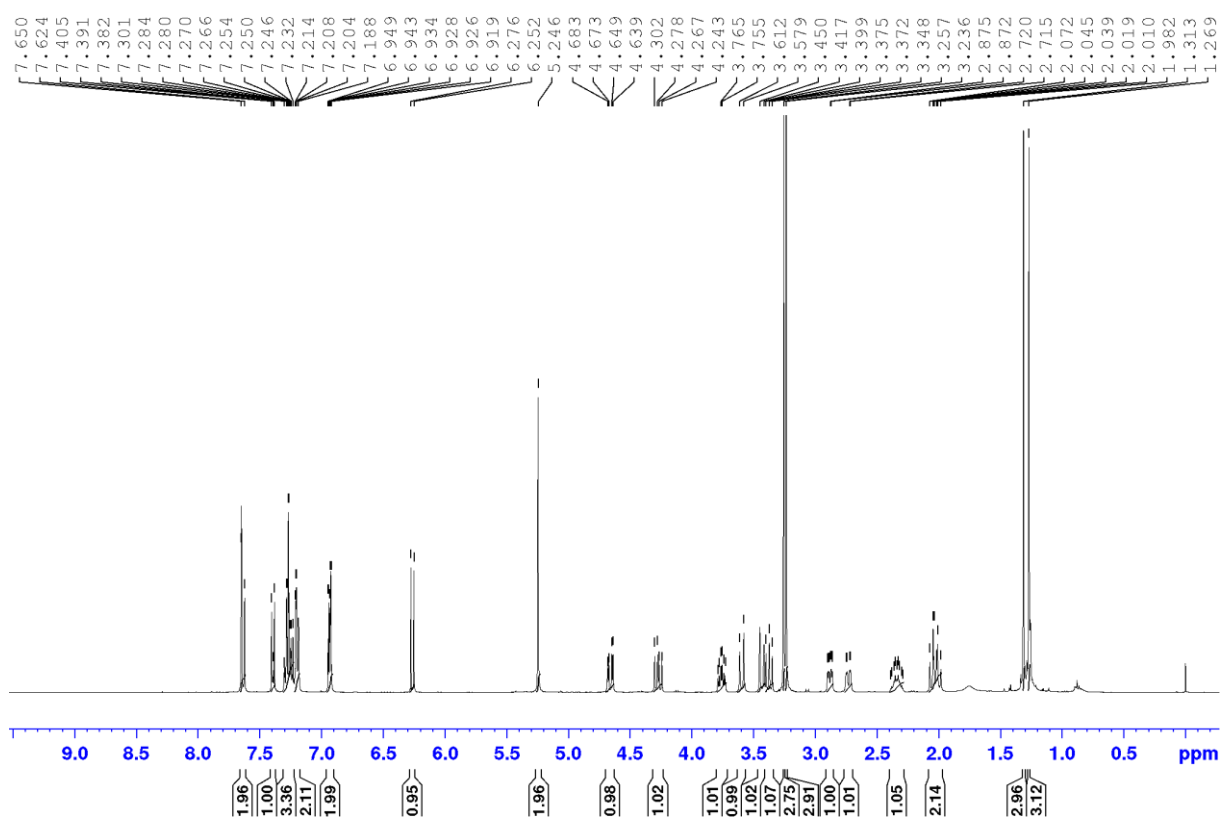



<sup>13</sup>C-NMR spectra of compound **17a** (CDCl<sub>3</sub>, 100.61 MHz)

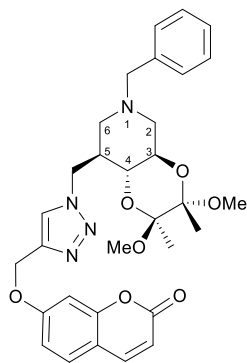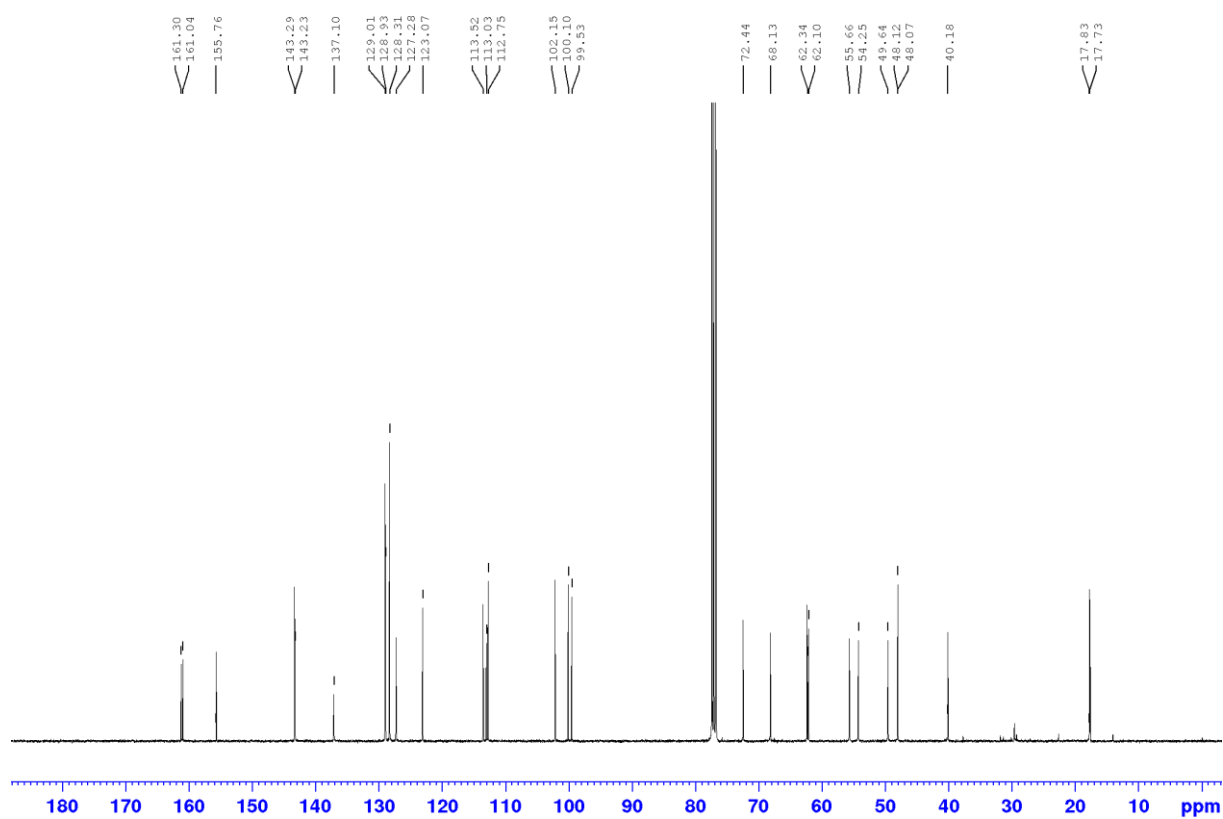

<sup>1</sup>H-NMR spectra of compound **17b** (CDCl<sub>3</sub>, 400.13 MHz)

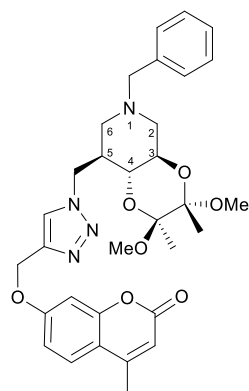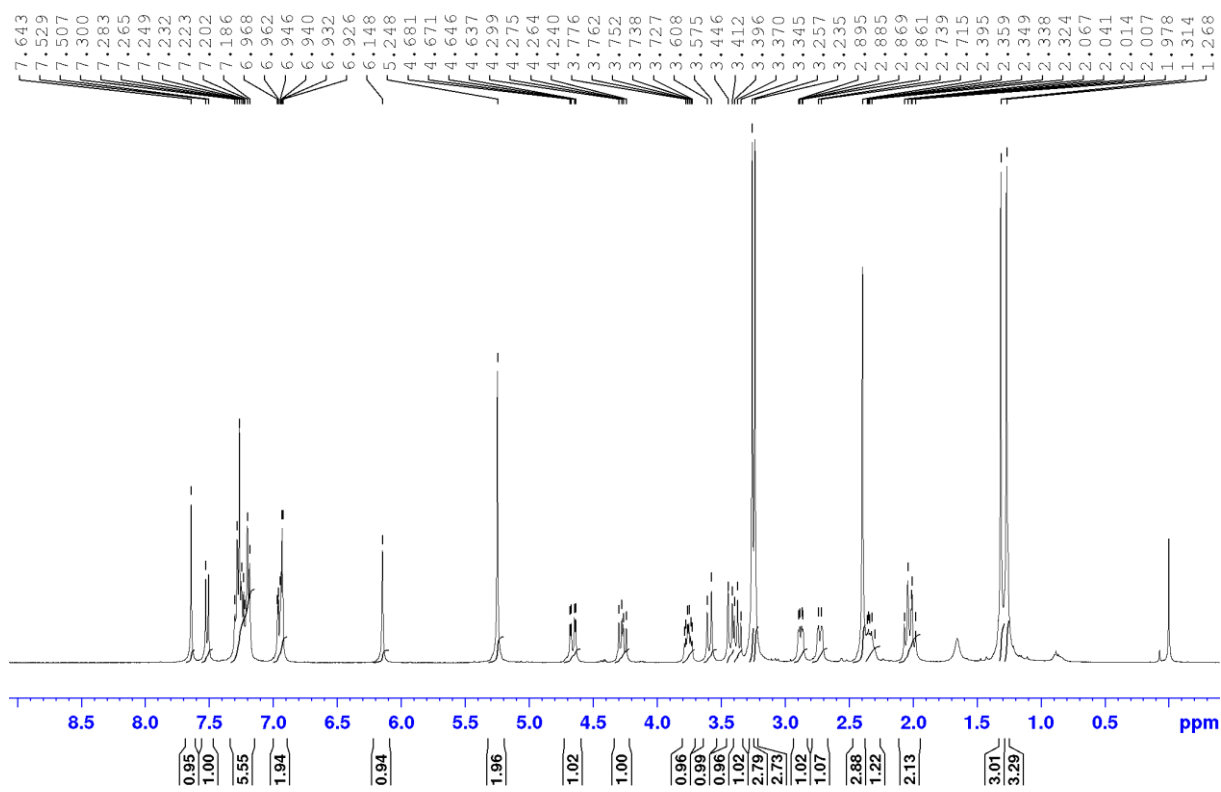

<sup>13</sup>C-NMR spectra of compound **17b** (CDCl<sub>3</sub>, 100.61 MHz)

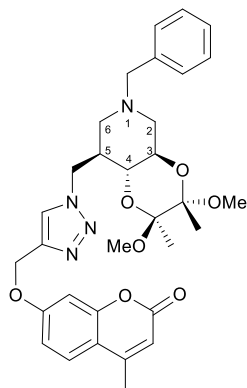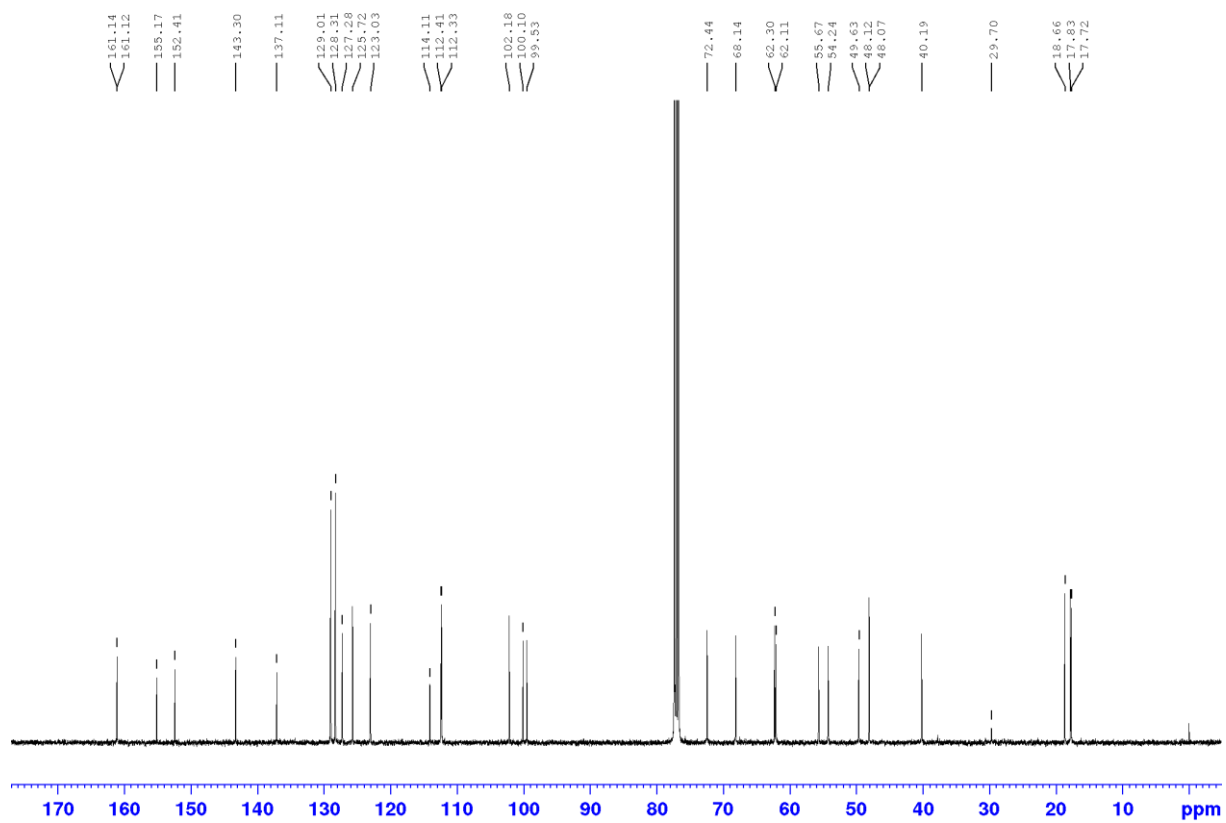

$^1\text{H-NMR}$  spectra of compound **17c** ( $\text{CDCl}_3$ , 400.13 MHz)

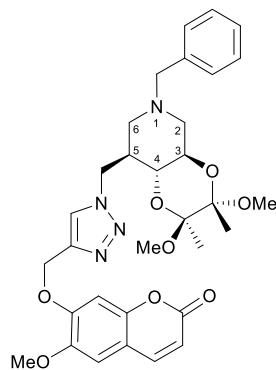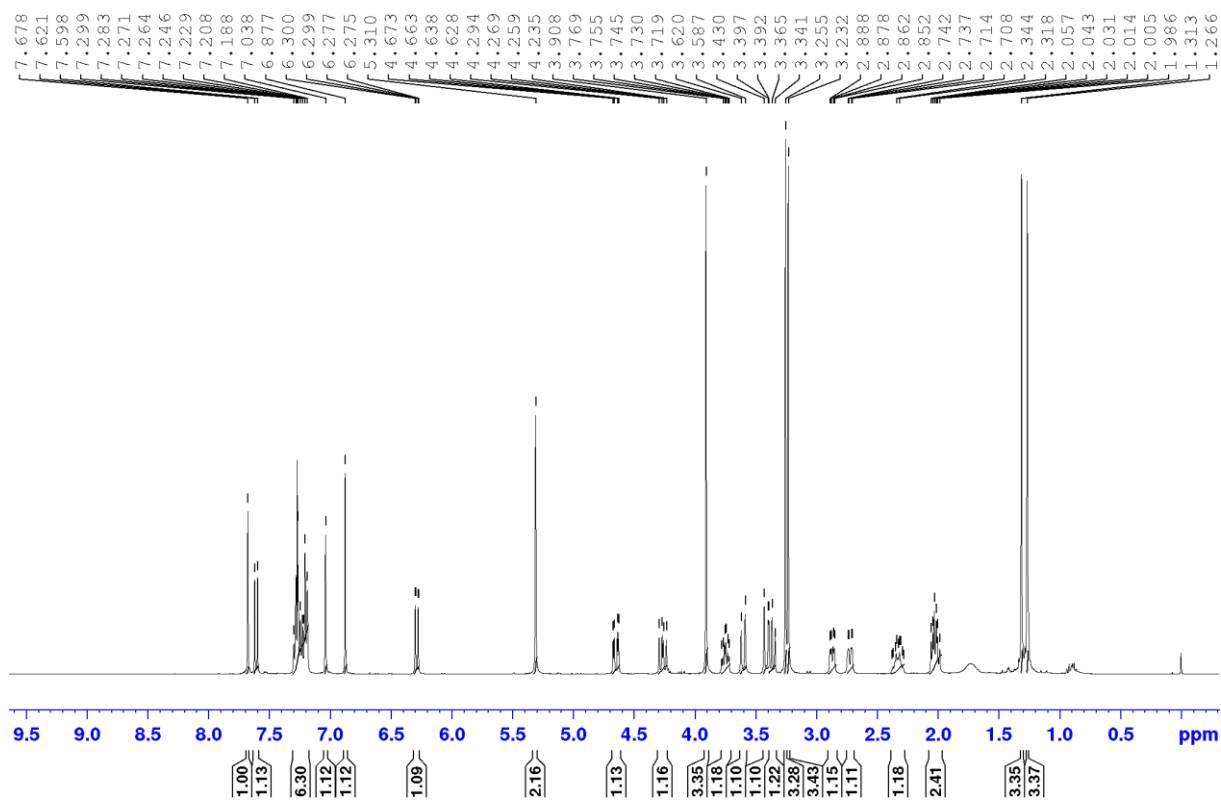

<sup>13</sup>C-NMR spectra of compound **17c** (CDCl<sub>3</sub>, 100.61 MHz)

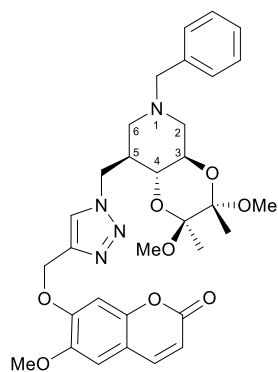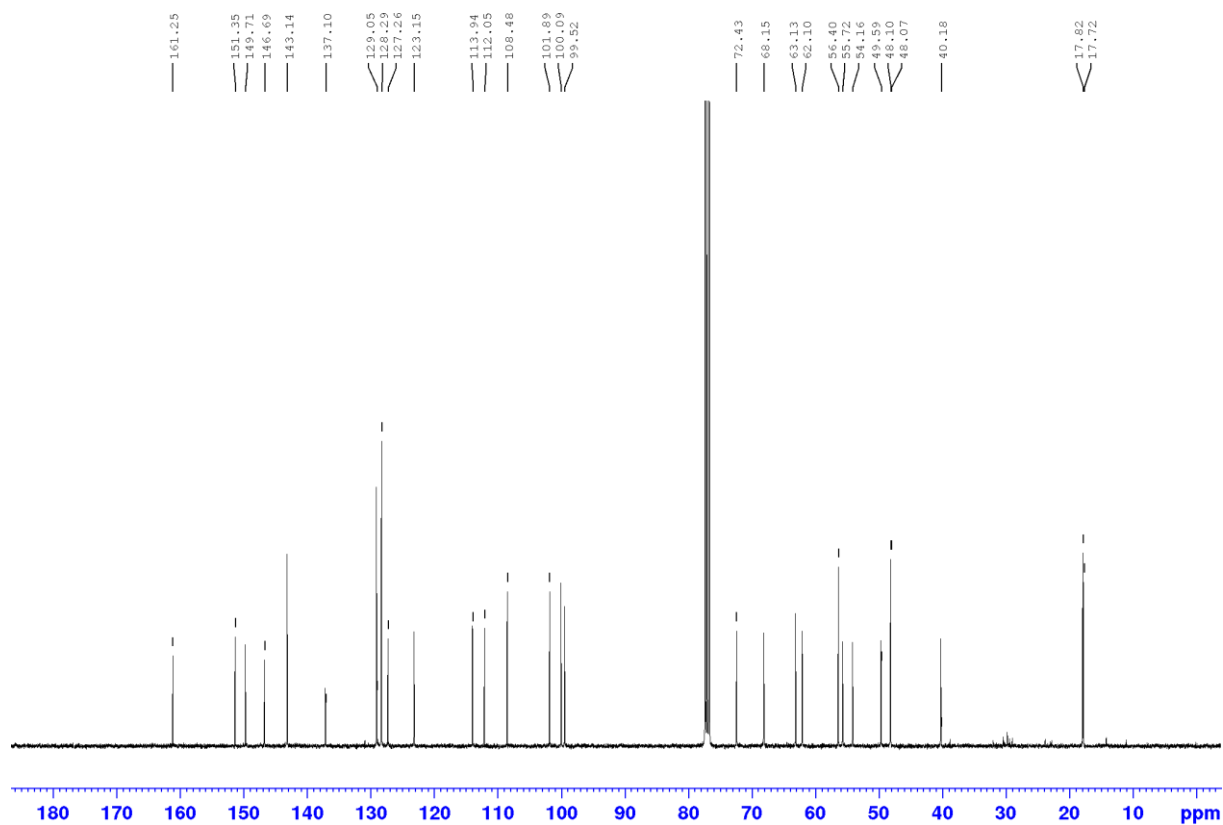

<sup>1</sup>H-NMR spectra of compound **17d** (CDCl<sub>3</sub>, 400.13 MHz)

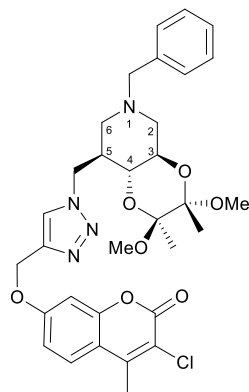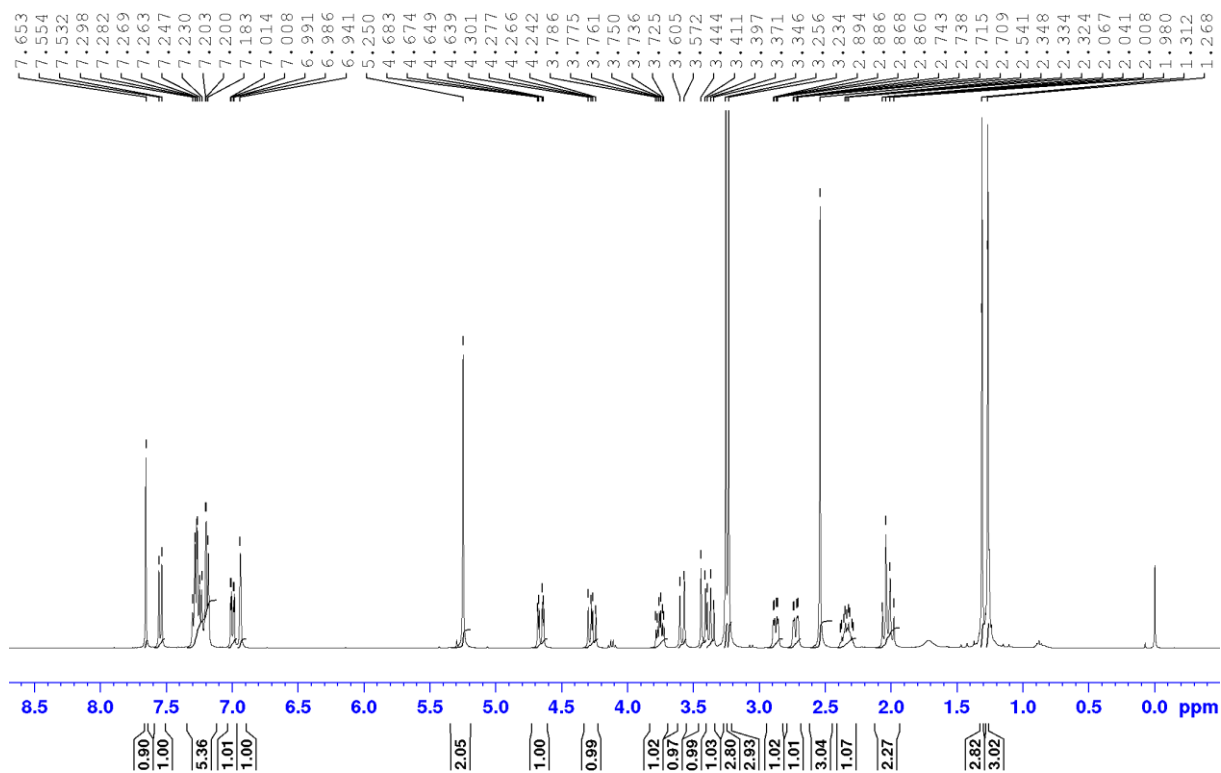

<sup>13</sup>C-NMR spectra of compound **17d** (CDCl<sub>3</sub>, 100.61 MHz)

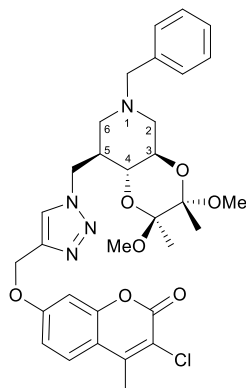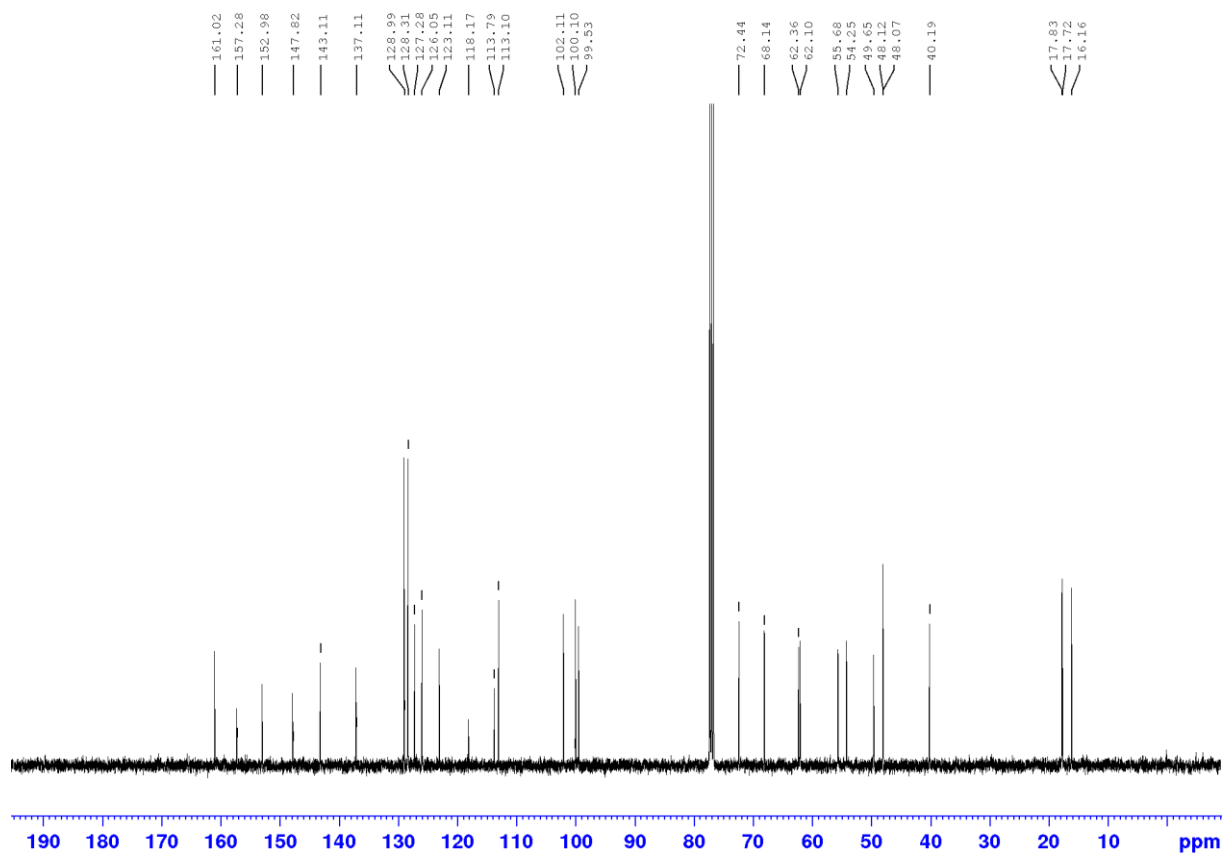

<sup>1</sup>H-NMR spectra of compound **17e** (CDCl<sub>3</sub>, 400.13 MHz)

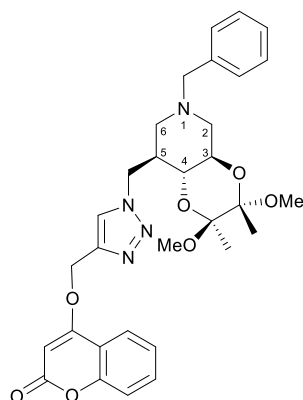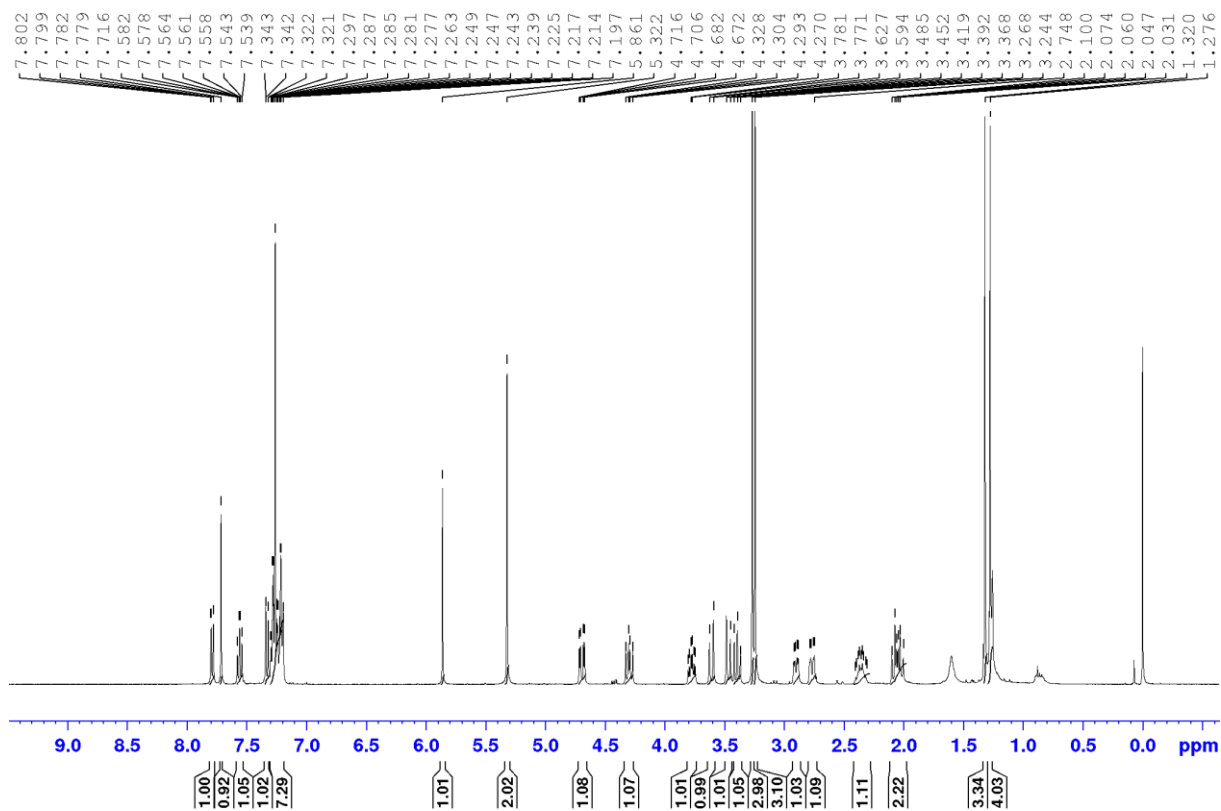



<sup>13</sup>C-NMR spectra of compound **17e** (CDCl<sub>3</sub>, 100.61 MHz)

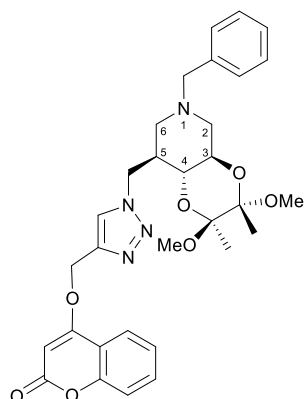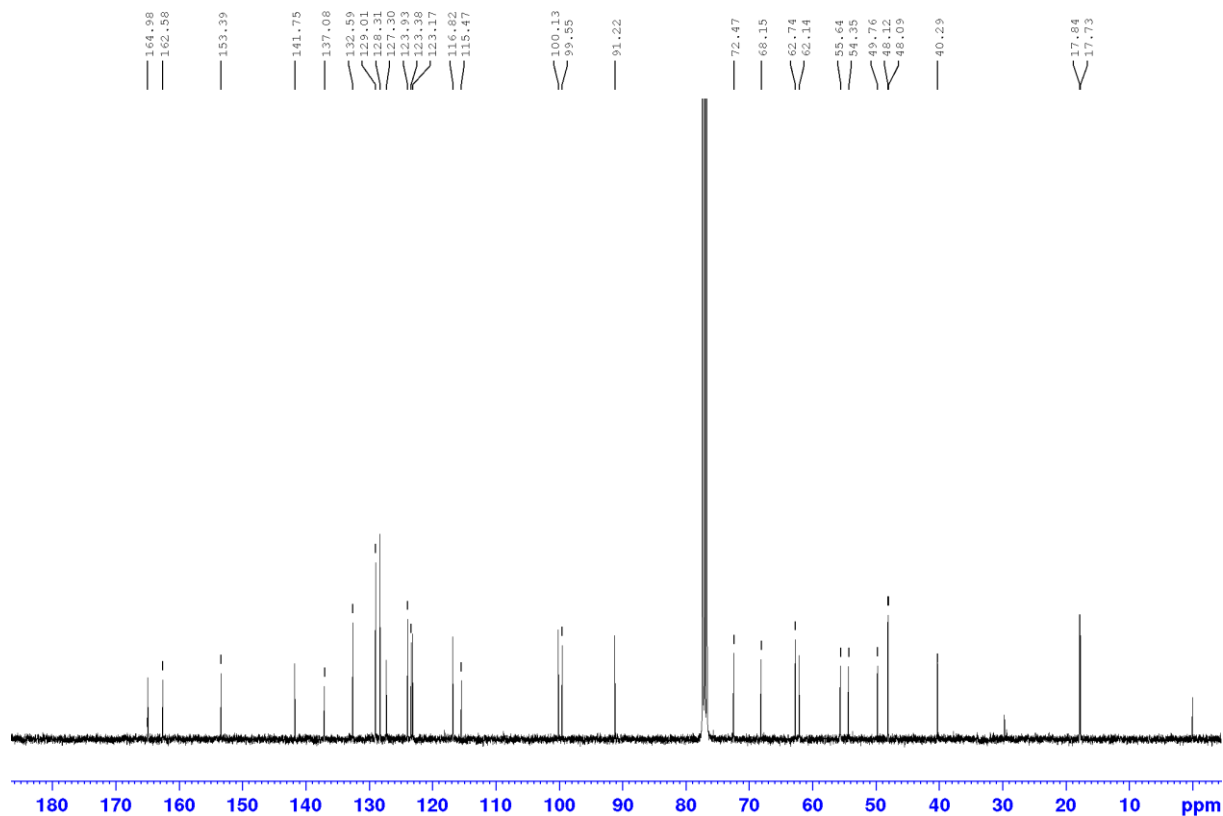

<sup>1</sup>H-NMR spectra of compound **20** (CDCl<sub>3</sub>, 400.13 MHz)

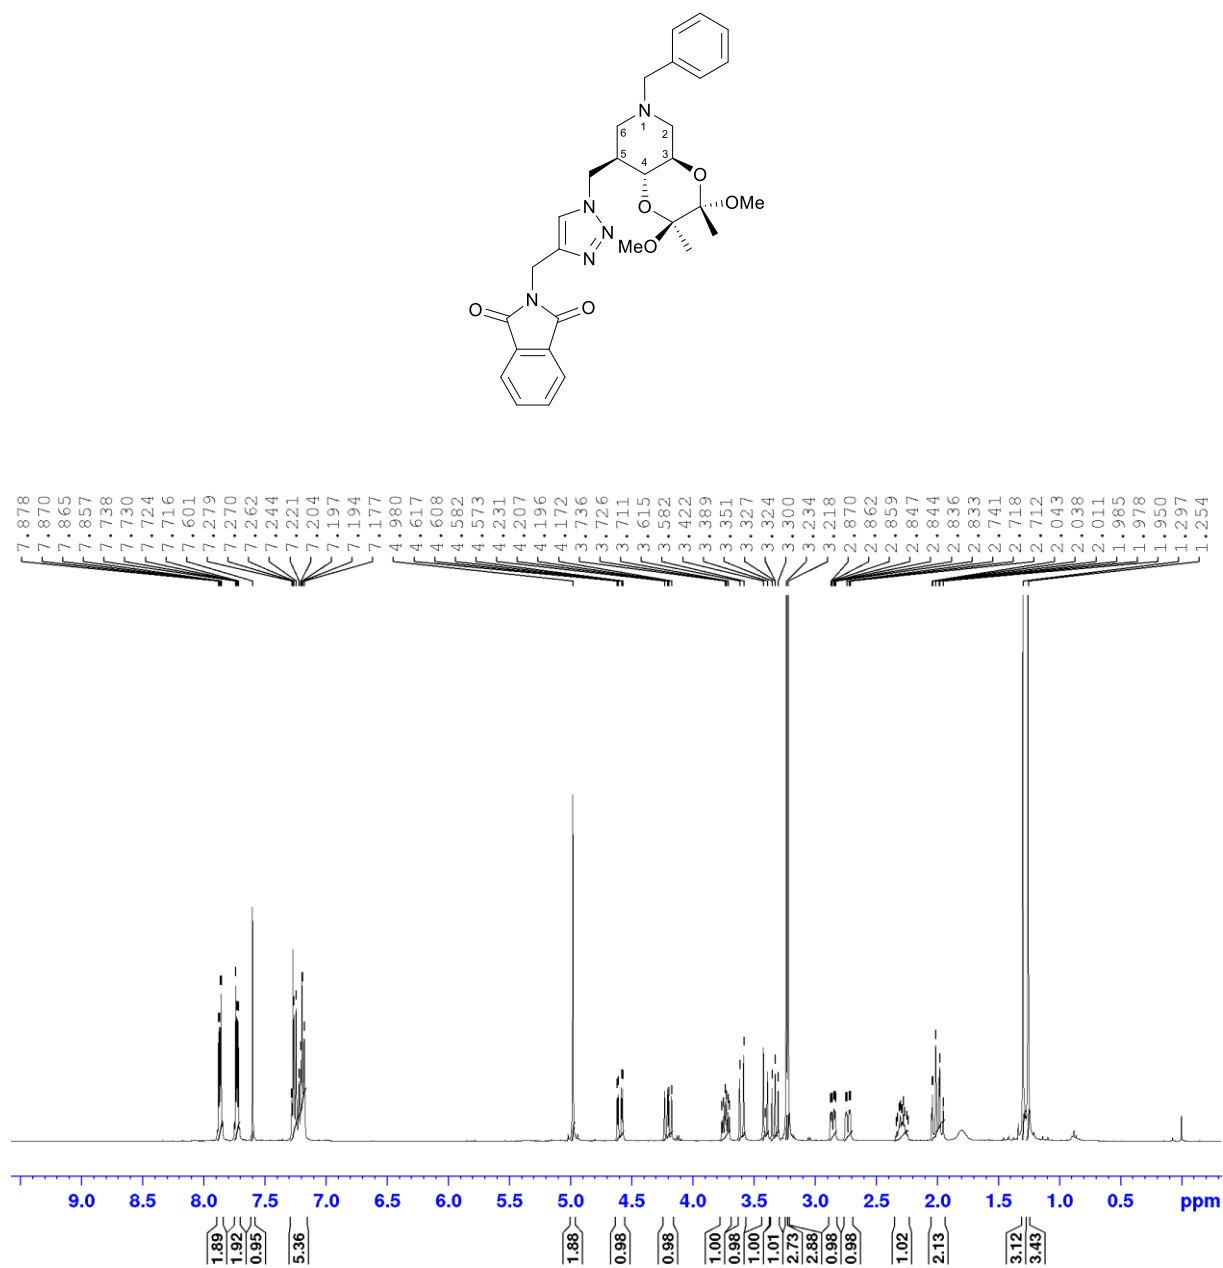

<sup>13</sup>C-NMR spectra of compound **20** (CDCl<sub>3</sub>, 100.61 MHz)

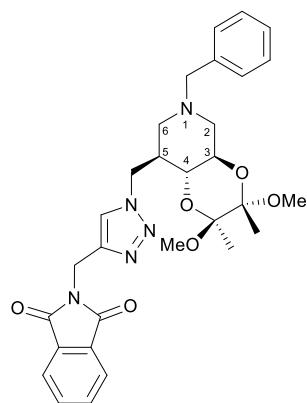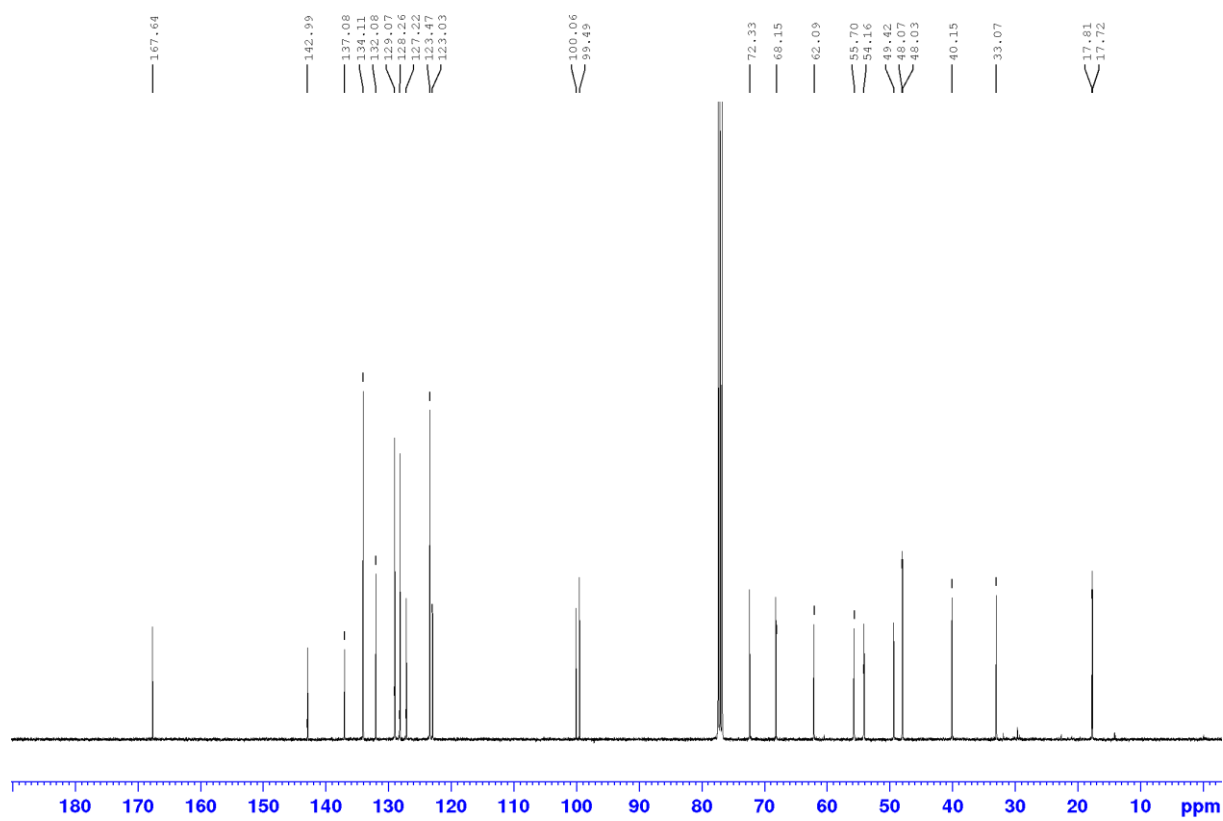

<sup>1</sup>H-NMR spectra of compound **8a** (CD<sub>3</sub>OD, 400.13 MHz)

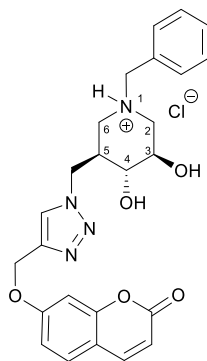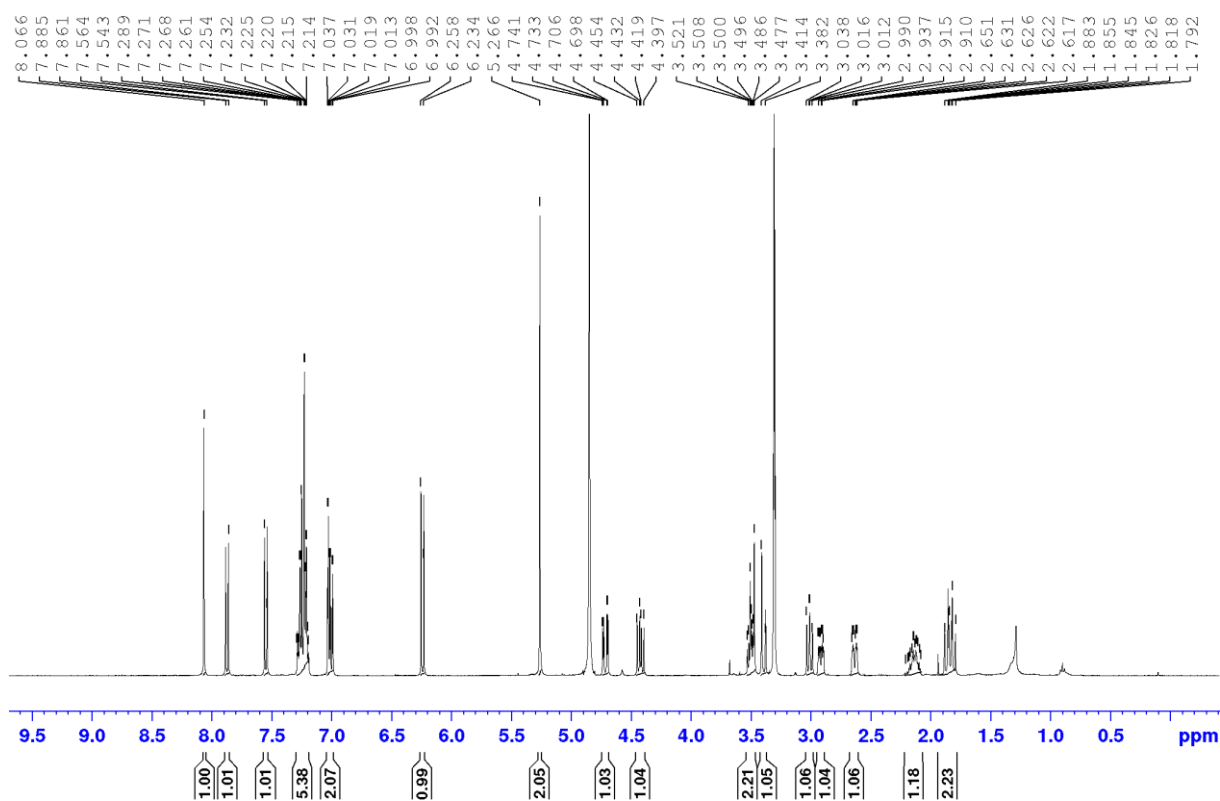

<sup>13</sup>C-NMR spectra of compound **8a** (CD<sub>3</sub>OD, 100.61 MHz)

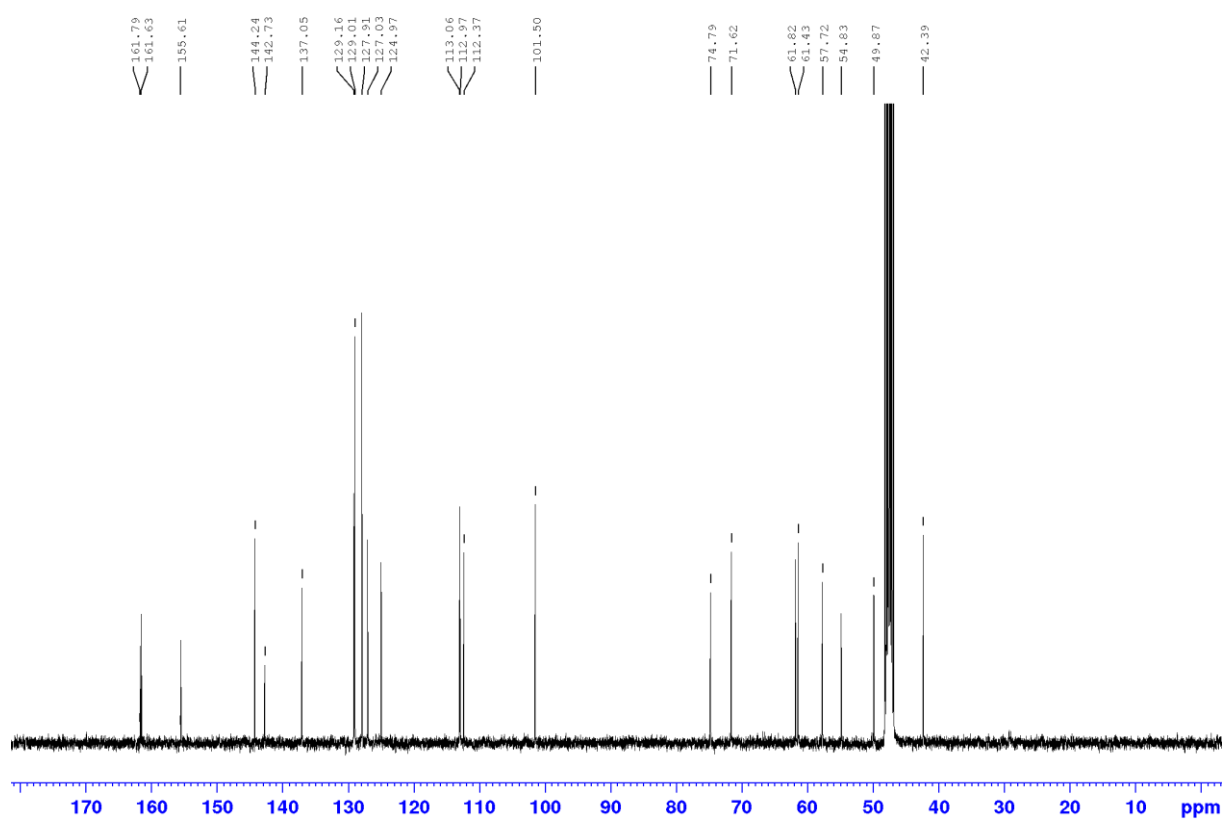

<sup>1</sup>H-NMR spectra of compound **8b** (CD<sub>3</sub>OD, 400.13 MHz)

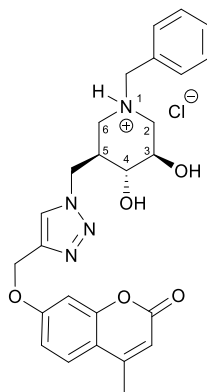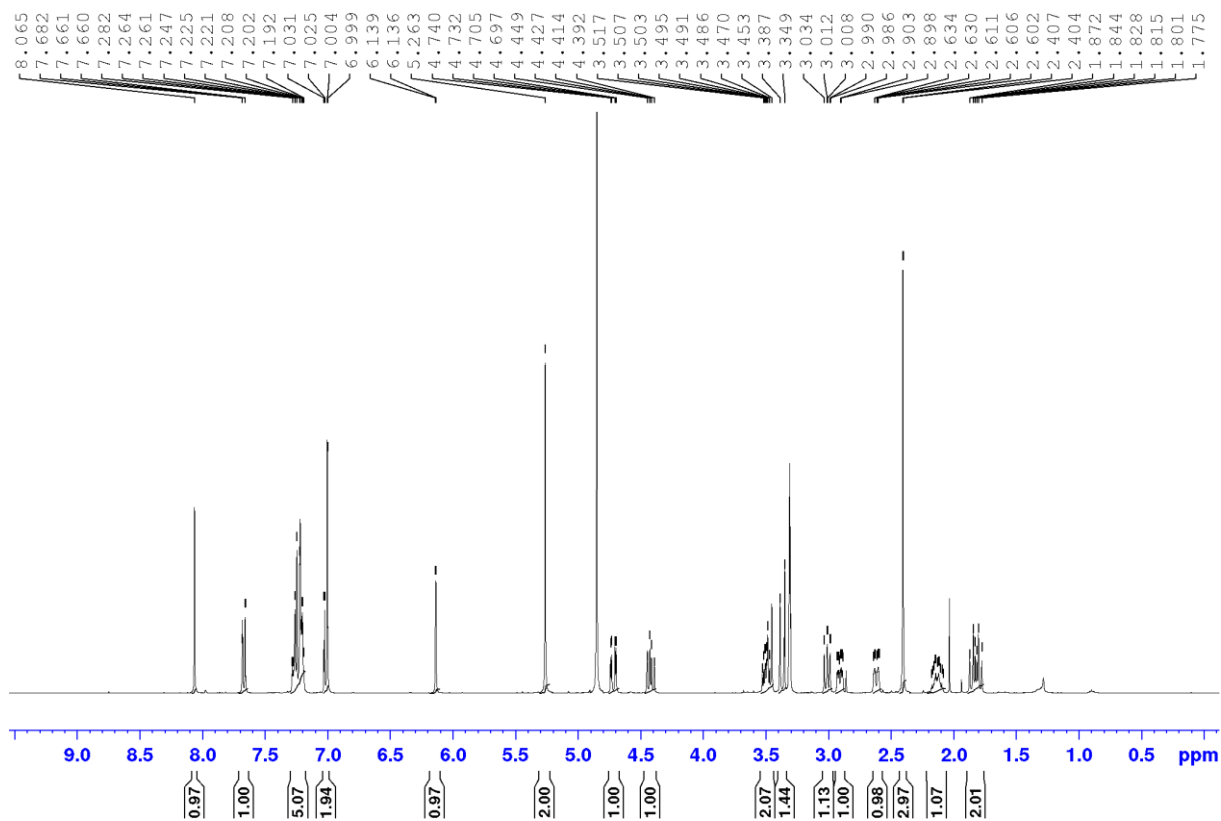

<sup>13</sup>C-NMR spectra of compound **8b** (CD<sub>3</sub>OD, 100.61 MHz)

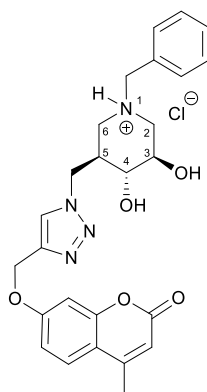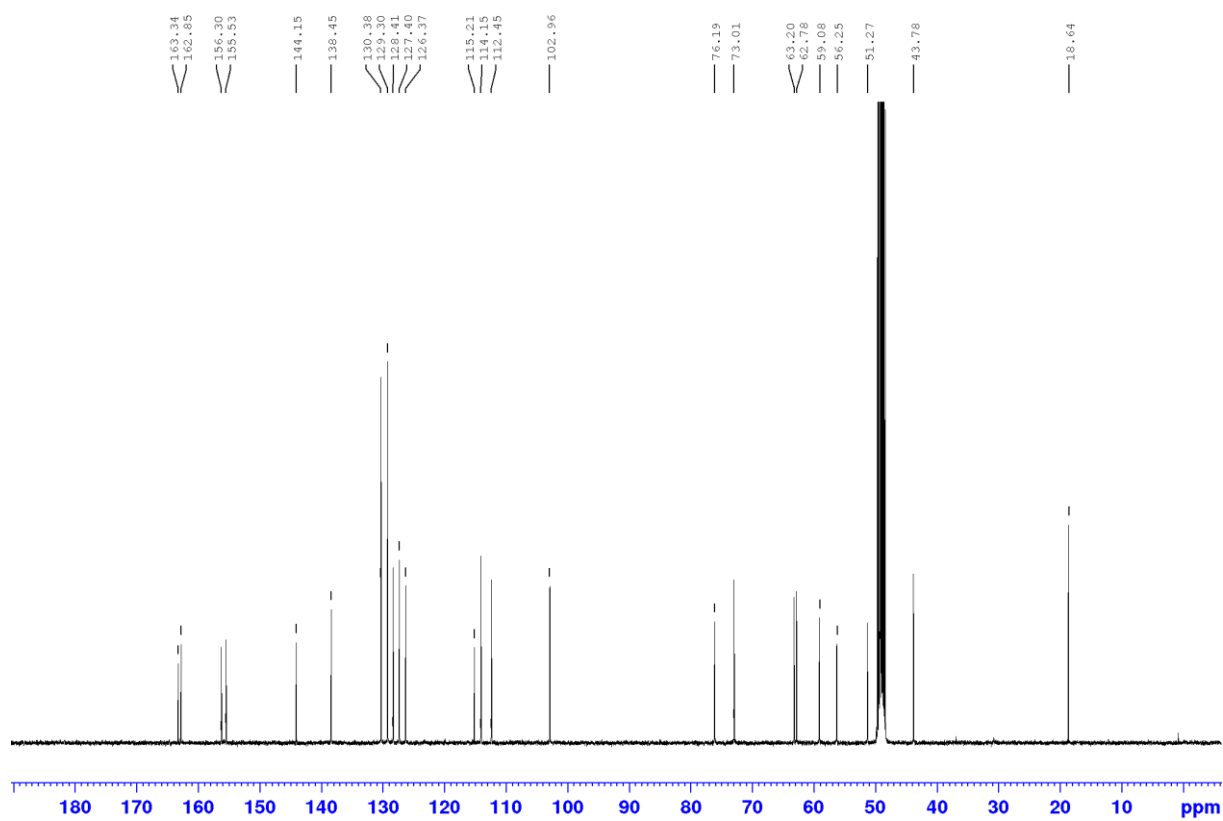

<sup>1</sup>H-NMR spectra of compound **8c** (DMSO, 400.13 MHz)

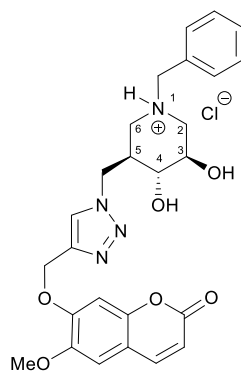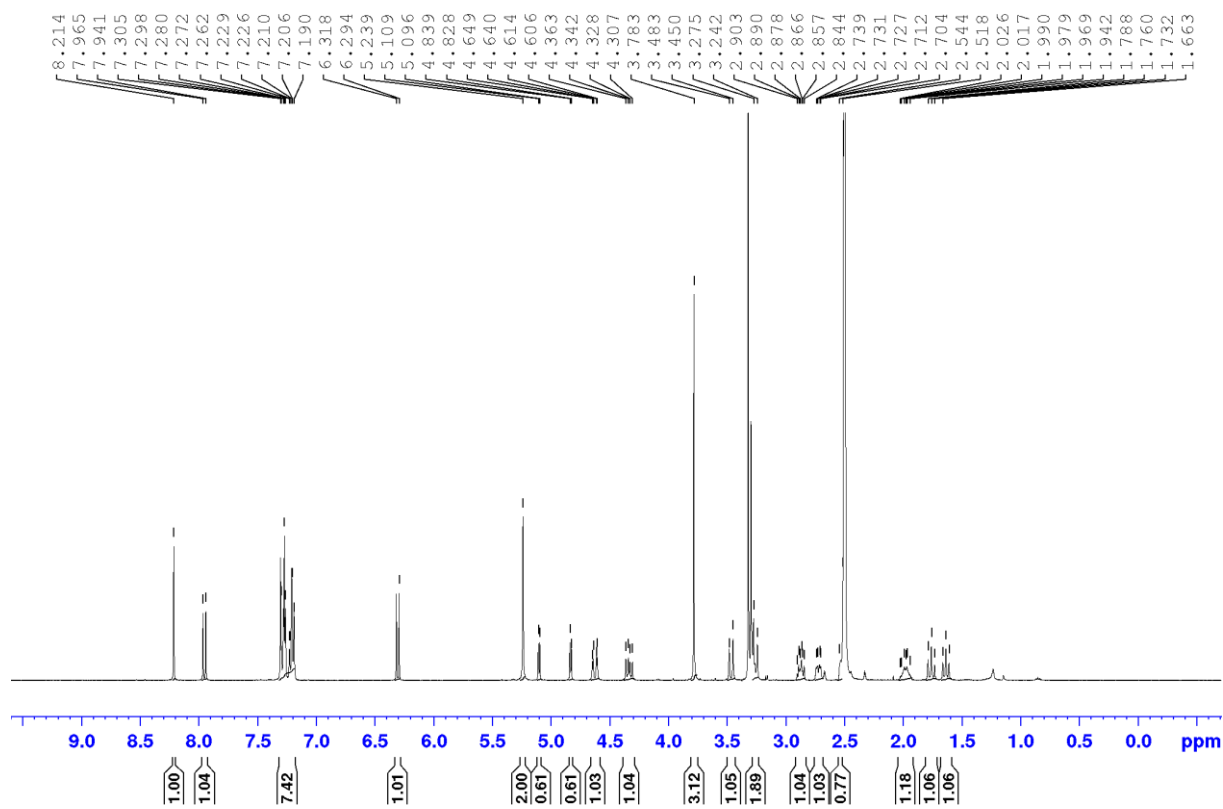



$^1\text{H-NMR}$  spectra of compound **8c** (DMSO, 400.13 MHz)

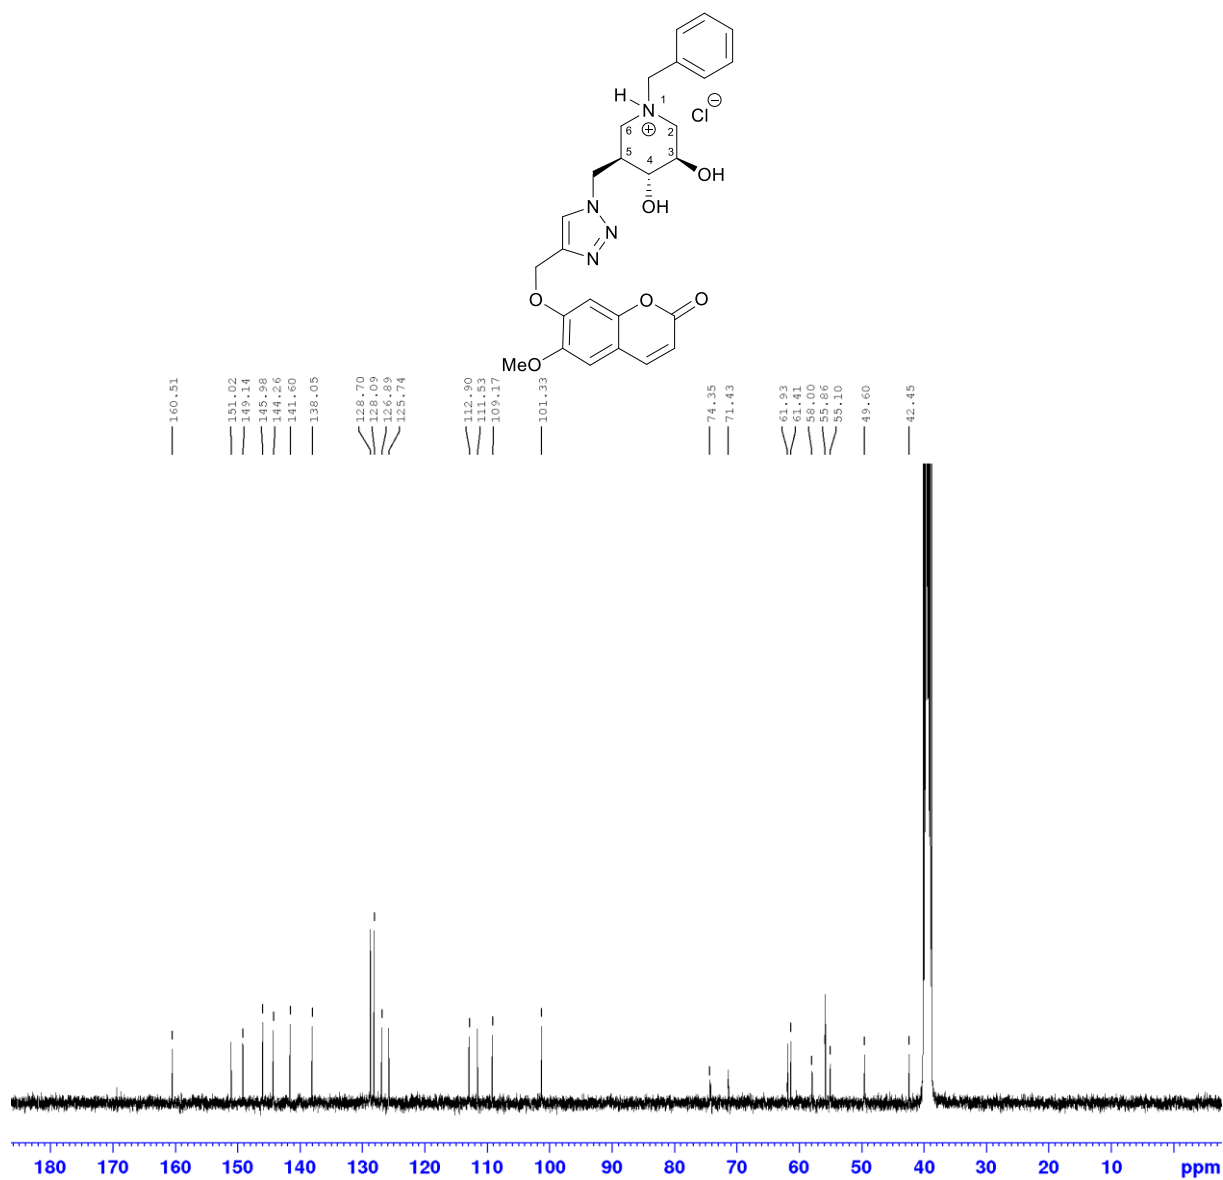

<sup>1</sup>H-NMR spectra of compound **8d** (CD<sub>3</sub>OD, 400.13 MHz)

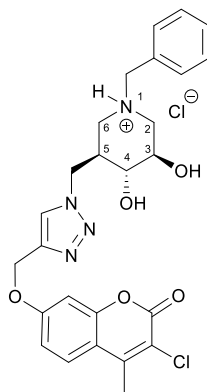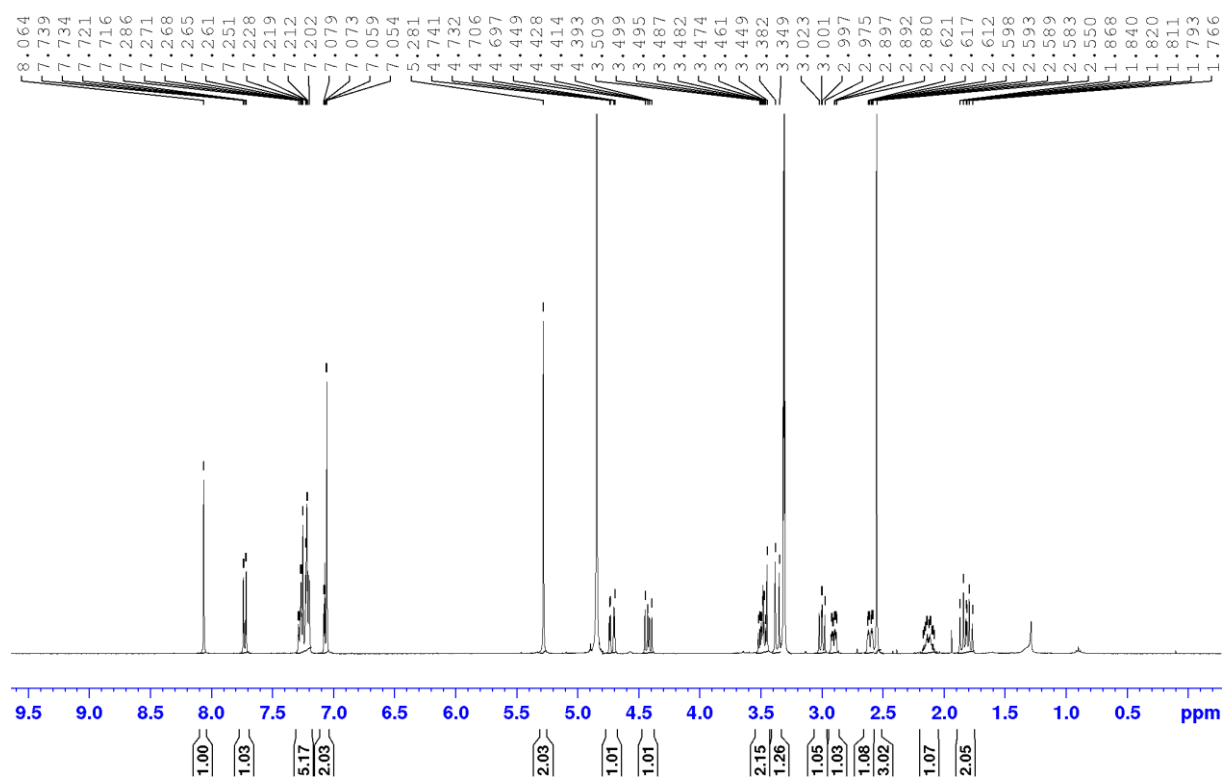

<sup>1</sup>H-NMR spectra of compound **8d** (CD<sub>3</sub>OD, 400.13 MHz)

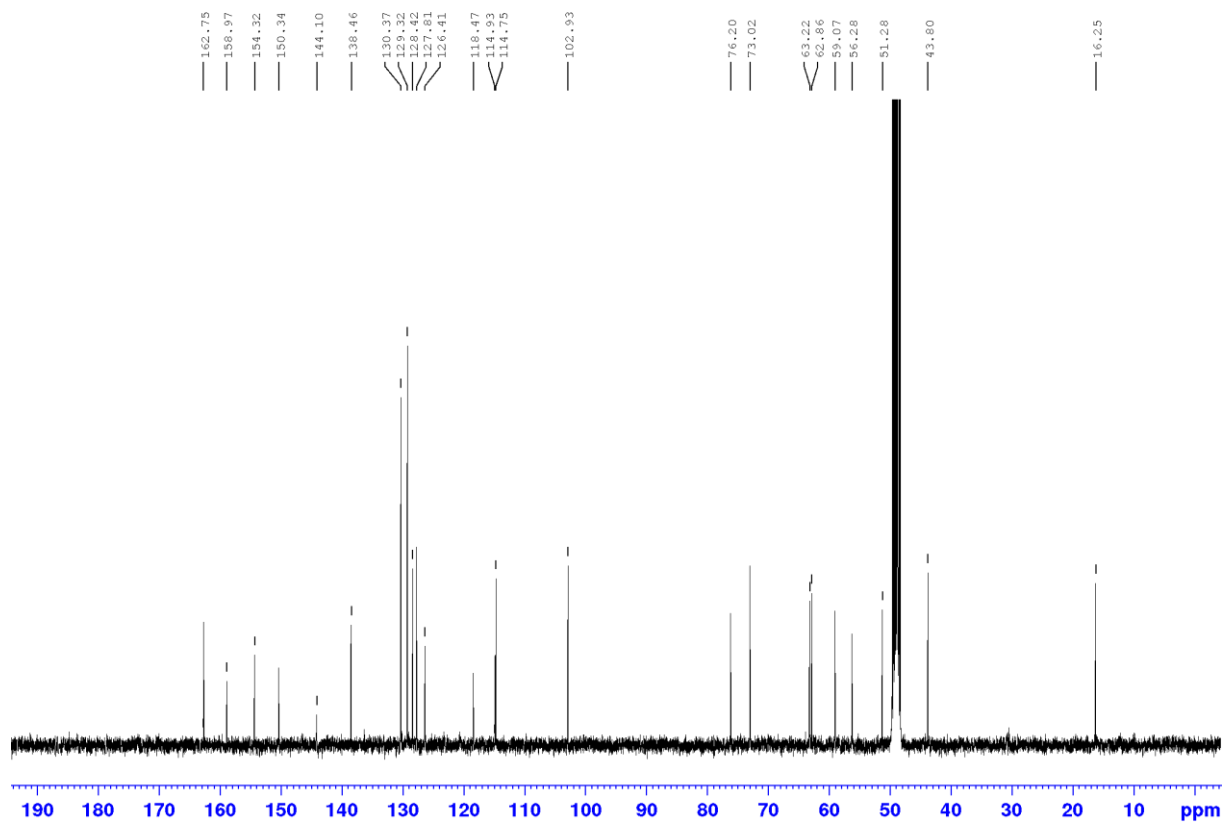

<sup>1</sup>H-NMR spectra of compound **8e** (CD<sub>3</sub>OD, 400.13 MHz)

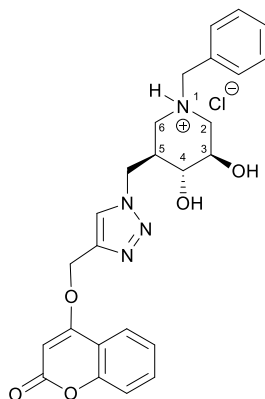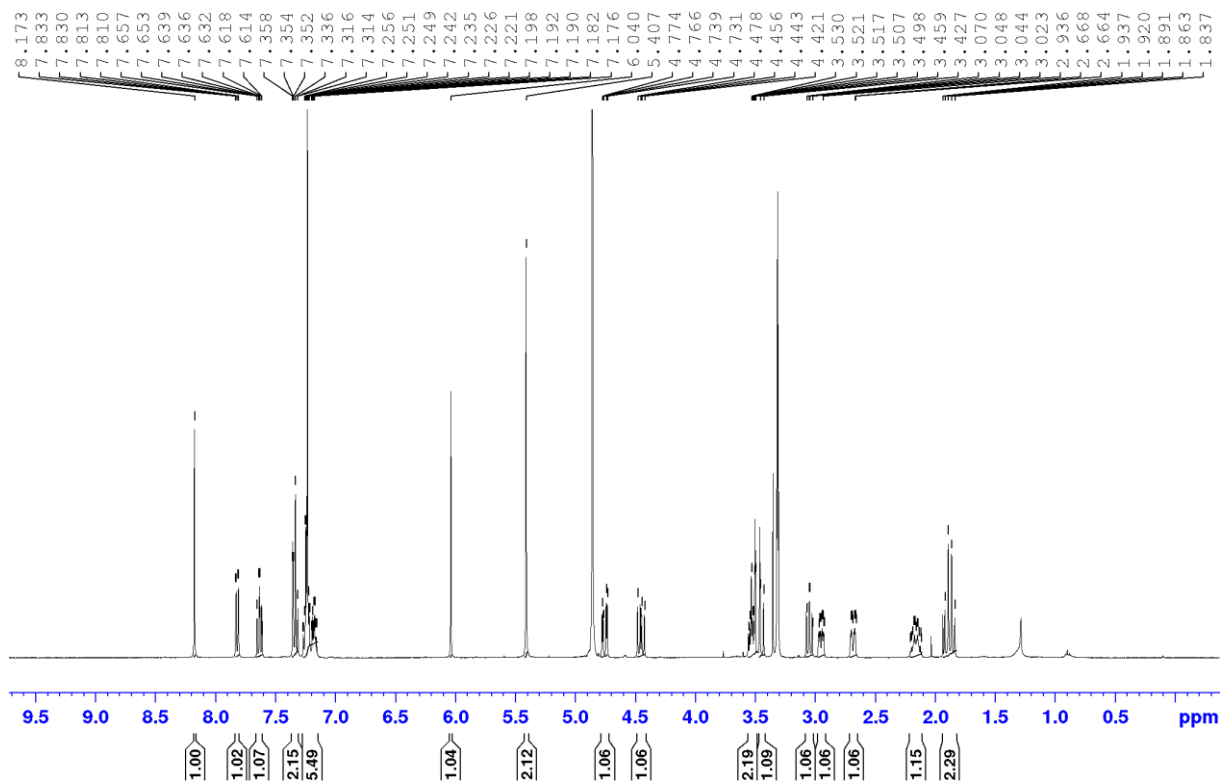

<sup>13</sup>C-NMR spectra of compound **8e** (CD<sub>3</sub>OD, 100.61 MHz)

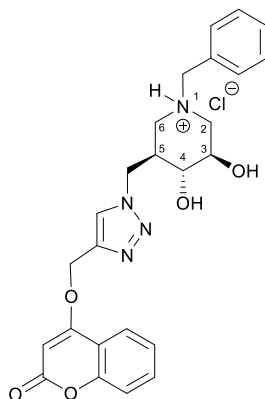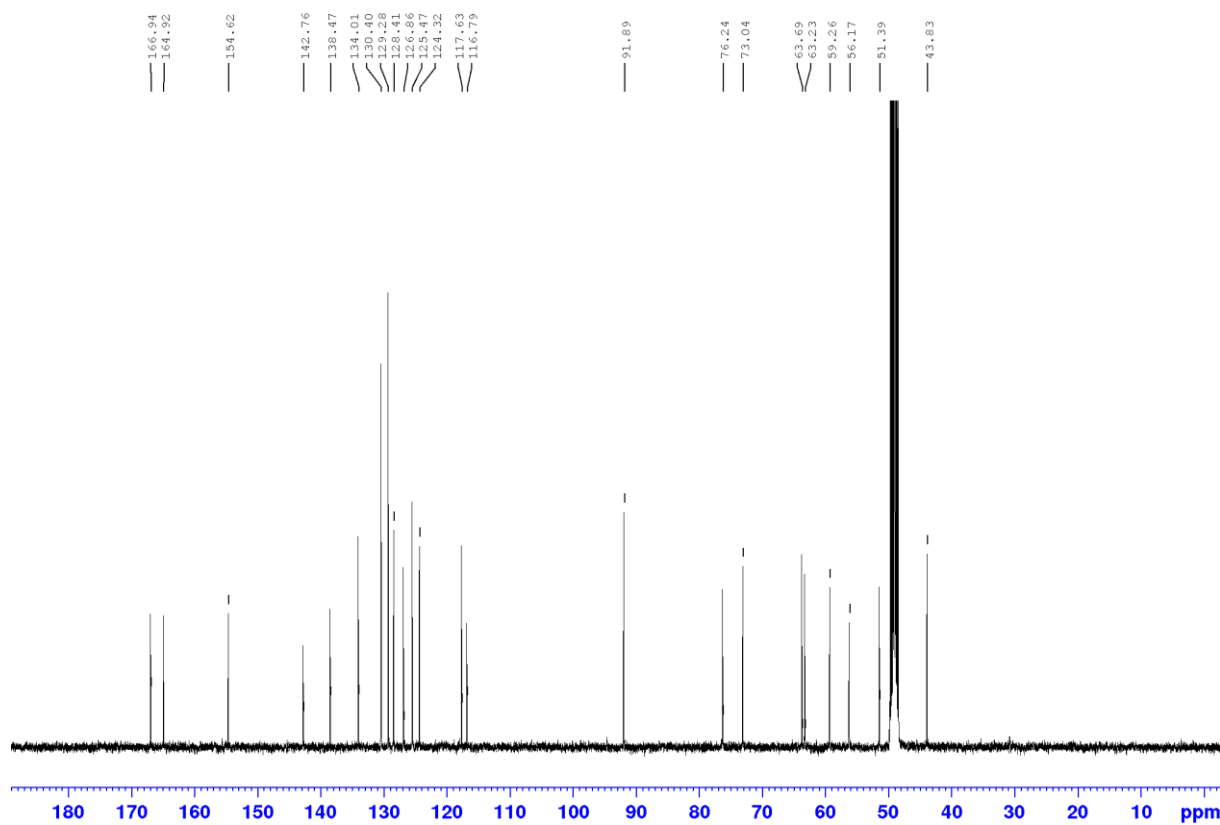

<sup>1</sup>H-NMR spectra of compound **21** (CD<sub>3</sub>OD, 400.13 MHz)

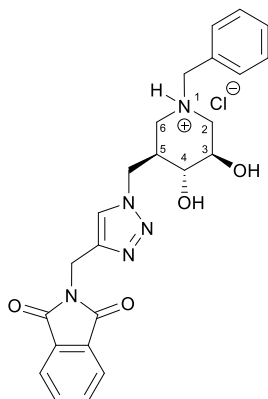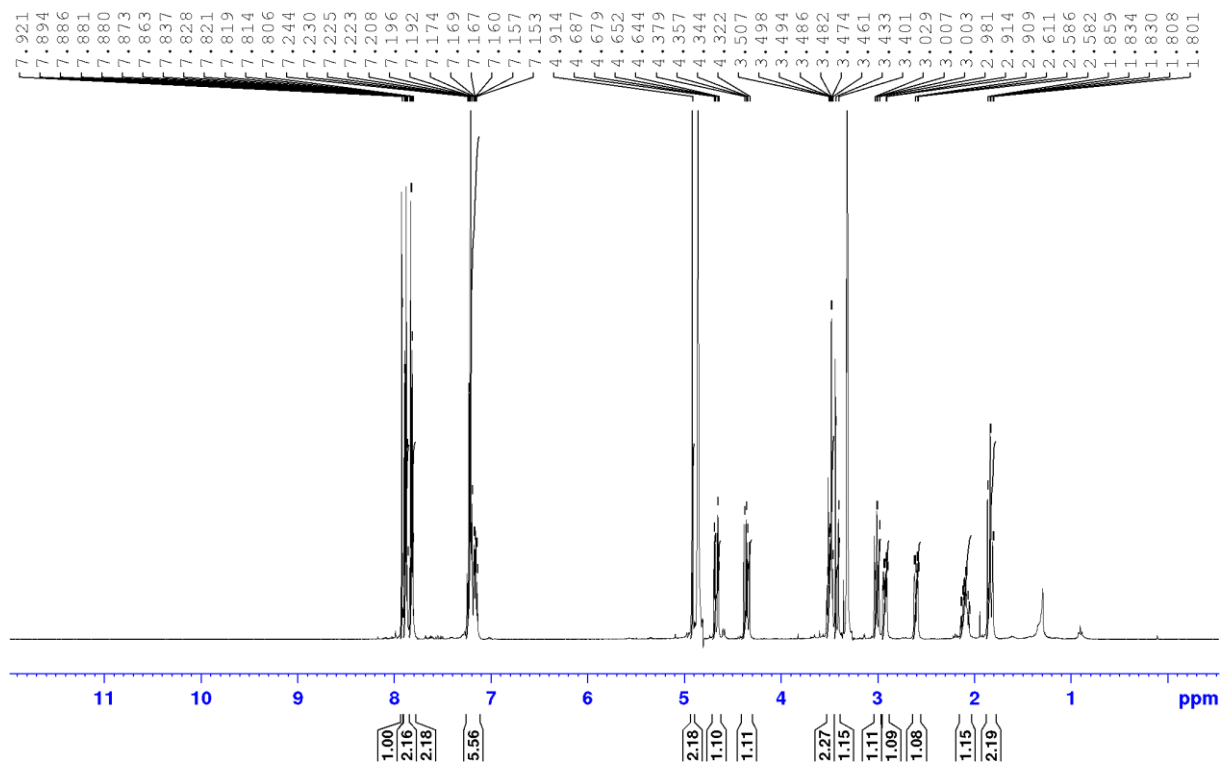

<sup>1</sup>H-NMR spectra of compound **21** (CD<sub>3</sub>OD, 400.13 MHz)

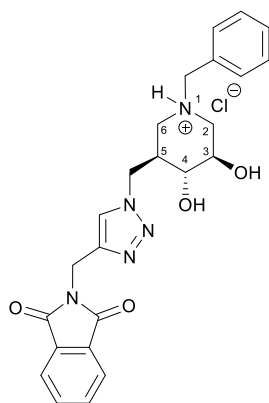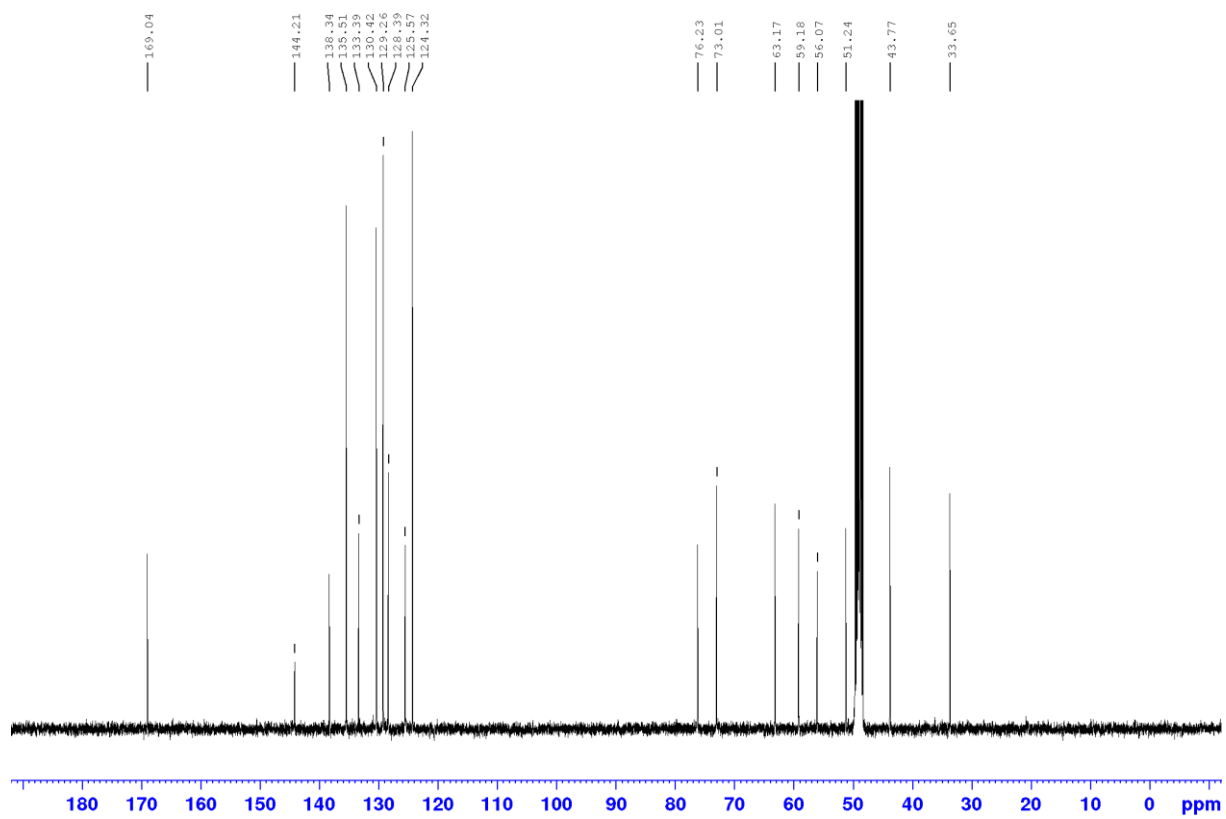

**Table S1.** Antiproliferative activity (GI<sub>50</sub>, μM)<sup>a</sup> against human solid tumor cell lines.

| Comp.            | Cell line (origin) |                     |                  |                  |                   |                 |
|------------------|--------------------|---------------------|------------------|------------------|-------------------|-----------------|
|                  | A549<br>(lung)     | HBL-100<br>(breast) | HeLa<br>(cervix) | SW1573<br>(lung) | T-47D<br>(breast) | WiDr<br>(colon) |
| <b>11</b>        | >100               | >100                | >100             | >100             | >100              | >100            |
| <b>10</b>        | >100               | >100                | >100             | >100             | >100              | >100            |
| <b>8a</b>        | >100               | >100                | 44±2.9           | 89±17            | >100              | 67±12           |
| <b>17a</b>       | 93±9.8             | 47±4.8              | 25±6.5           | 46±13            | >100              | 40±11           |
| <b>8b</b>        | >100               | 97±6.6              | 83±20            | 94±12            | >100              | >100            |
| <b>17b</b>       | 97±4.0             | 52±7.3              | 48±22            | 96±8.4           | >100              | 95±2.1          |
| <b>8c</b>        | 95±12              | 89±28               | 88±30            | 85±36            | >100              | 88±30           |
| <b>17c</b>       | 89±27              | 66±32               | 45±22            | 77±36            | >100              | 39±9.7          |
| <b>8d</b>        | 70±2.2             | 56±18               | 53±22            | 98±3.0           | 78±16             | 47±7.4          |
| <b>17d</b>       | 90±20              | 82±35               | >100             | 95±9.9           | n.t. <sup>b</sup> | 5.6±1.1         |
| <b>8e</b>        | >100               | >100                | 98±3.9           | 97±5.5           | >100              | >100            |
| <b>17e</b>       | 88±8.0             | 40±3.2              | 34±11            | 60±11            | 66±4.9            | 44±15           |
| <b>21</b>        | >100               | 84±39               | 85±37            | 85±37            | >100              | 84±39           |
| <b>20</b>        | 73±21              | 89±28               | 58±21            | 84±28            | >100              | 54±19           |
| <b>Cisplatin</b> | 4.9±0.2            | 1.9±0.2             | 1.8±0.5          | 2.7±0.4          | 17±3.3            | 23±4.3          |

<sup>a</sup>Values ± standard deviation from two to six representative experiments. <sup>b</sup>n.t. = not tested.
